# Supplementary material for: DeepCoil—a fast and accurate prediction of coiled-coil domains in protein sequences
Source: Oxford University Press journal article supplement (doi:10.1093/bioinformatics/bty1062), 2018-12-27
Supplement: bty1062_supplementary_data.pdf [file bty1062_supplementary_data.pdf]

## DeepCoil – a fast and accurate prediction of coiled-coil domains in protein sequences

**Supplementary Table 1.** Statistics on the coiled coil oligomeric states, orientation, and presence of non-canonical interactions for the sequences used in the training and test sets.

| Category                       | Training set <sup>(a)</sup> | Test set #1 <sup>(b)</sup> | Test set #2 (Li et al.) <sup>(b, c)</sup> |
|--------------------------------|-----------------------------|----------------------------|-------------------------------------------|
| Number of sequences            | 10,438                      | 1,193                      | 518                                       |
| Number of residues             | 2,569,729                   | 259,070                    | 123,678                                   |
| Number of coiled-coil residues | 77,780                      | 7,862                      | 14,385                                    |
| % of non-canonical residues    | 5.6%                        | 5.0%                       | 3.1%                                      |
| Number of coiled-coil regions  | 4,140                       | 417                        | 745                                       |
| % of parallel dimers           | 21.3%                       | 25.9%                      | 18.1%                                     |
| % of antiparallel dimers       | 54.6%                       | 55.6%                      | 65.9%                                     |
| % of trimers                   | 17.3%                       | 14.3%                      | 11.4%                                     |
| % of tetramers                 | 6.2%                        | 3.8%                       | 4.3%                                      |

<sup>(a)</sup> Maximal pairwise sequence identity in the training set is 50%; <sup>(b)</sup> Maximal pairwise sequence identity in the test sets is 30% and none of the test sets sequences shows more than 30% sequence identity to the training set sequences; <sup>(c)</sup> A test set derived from the test set defined in a study of (Li *et al.*, 2016).

**Supplementary Table 2.** Per-residue classification performance scores (area under the ROC curve) for the categories defined in Supplementary Table 1 assessed with the aid of test set #1 (defined in this study).

| Method                    | Parallel dimers | Antiparallel dimers | Trimers | Tetramers | Non-canonical |
|---------------------------|-----------------|---------------------|---------|-----------|---------------|
| DeepCoil_PSSM             | 0.968           | 0.958               | 0.946   | 0.985     | 0.942         |
| DeepCoil_SEQ              | 0.954           | 0.920               | 0.897   | 0.963     | 0.900         |
| PCOILS_28 <sup>(a)</sup>  | 0.924           | 0.830               | 0.825   | 0.931     | 0.863         |
| PCOILS_21 <sup>(a)</sup>  | 0.928           | 0.832               | 0.842   | 0.939     | 0.870         |
| COILS_28 <sup>(a)</sup>   | 0.885           | 0.766               | 0.747   | 0.880     | 0.785         |
| Marcoil                   | 0.862           | 0.766               | 0.777   | 0.900     | 0.817         |
| PCOILS_14 <sup>(a)</sup>  | 0.926           | 0.814               | 0.833   | 0.915     | 0.864         |
| COILS_21 <sup>(a)</sup>   | 0.908           | 0.803               | 0.801   | 0.908     | 0.843         |
| CCHMM_PROF <sup>(b)</sup> | –               | –                   | –       | –         | –             |
| COILS_14 <sup>(a)</sup>   | 0.912           | 0.799               | 0.790   | 0.906     | 0.837         |
| Multicoil2                | 0.829           | 0.702               | 0.615   | 0.795     | 0.707         |

<sup>(a)</sup> suffix refers to the length of the scanning window; <sup>(b)</sup> CCHMM\_PROF does not return per-residue probabilities.

**Supplementary Table 3.** Per-residue classification performance scores (area under the ROC curve) for the categories defined in Supplementary Table 1 assessed with the aid of test set #2 (defined based on the study of Li et al.).

| Method                    | Parallel dimers | Antiparallel dimers | Trimers | Tetramers | Non-canonical |
|---------------------------|-----------------|---------------------|---------|-----------|---------------|
| DeepCoil_PSSM             | 0.921           | 0.951               | 0.943   | 0.925     | 0.900         |
| DeepCoil_SEQ              | 0.893           | 0.906               | 0.879   | 0.900     | 0.849         |
| PCOILS_28 <sup>(a)</sup>  | 0.827           | 0.837               | 0.836   | 0.817     | 0.765         |
| PCOILS_21 <sup>(a)</sup>  | 0.835           | 0.837               | 0.827   | 0.811     | 0.755         |
| COILS_28 <sup>(a)</sup>   | 0.765           | 0.791               | 0.783   | 0.765     | 0.724         |
| Marcoil                   | 0.797           | 0.799               | 0.770   | 0.777     | 0.749         |
| PCOILS_14 <sup>(a)</sup>  | 0.830           | 0.819               | 0.795   | 0.800     | 0.731         |
| COILS_21 <sup>(a)</sup>   | 0.819           | 0.818               | 0.795   | 0.798     | 0.732         |
| CCHMM_PROF <sup>(b)</sup> | –               | –                   | –       | –         | –             |
| COILS_14 <sup>(a)</sup>   | 0.819           | 0.808               | 0.776   | 0.792     | 0.747         |
| Multicoil2                | 0.676           | 0.693               | 0.694   | 0.621     | 0.701         |

<sup>(a)</sup> suffix refers to the length of the scanning window; <sup>(b)</sup> CCHMM\_PROF does not return per-residue probabilities.

**Supplementary Figure 1.** Performance of per-residue coiled coil predictions for **(A)** parallel dimers, **(B)** antiparallel dimers, **(C)** trimers, **(D)** tetramers assessed with the aid of test set #1 (defined in this study; left column) and test set #2 (defined based on the work of (Li *et al.*, 2016); right column). For clarity, some of the methods were omitted. For all AUC scores see Supplementary Tables 2 and 3.

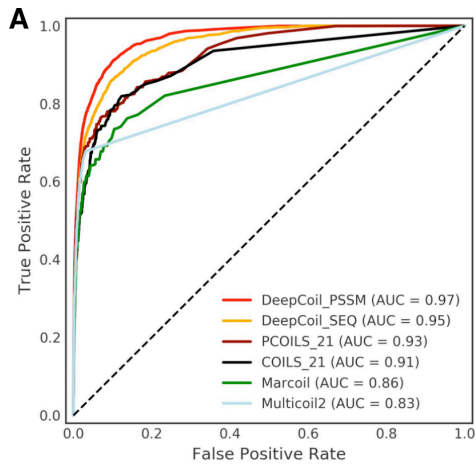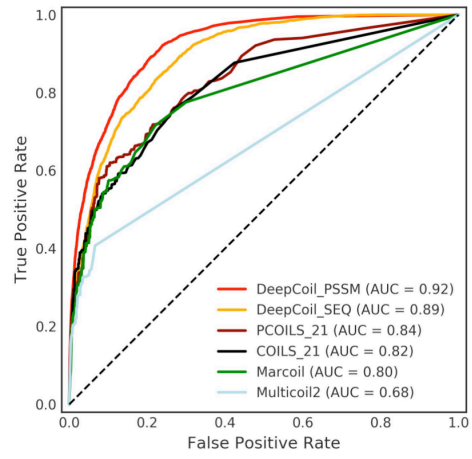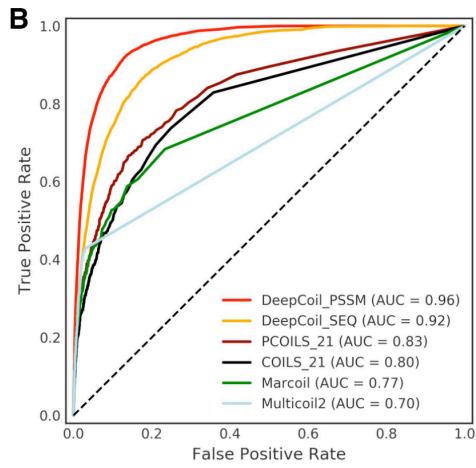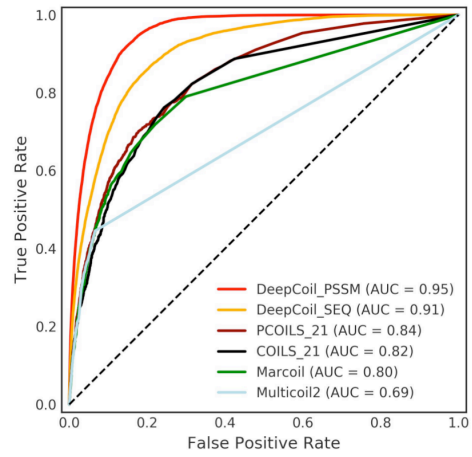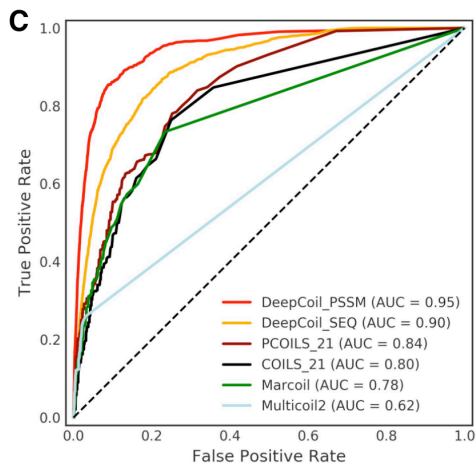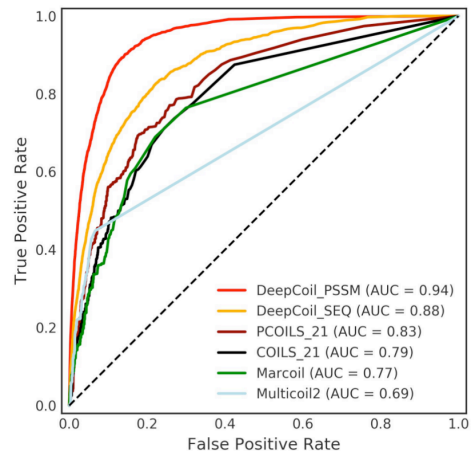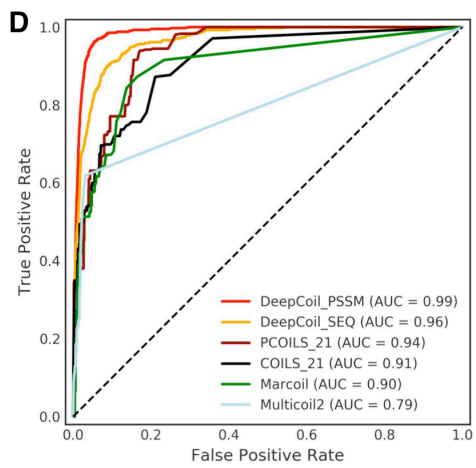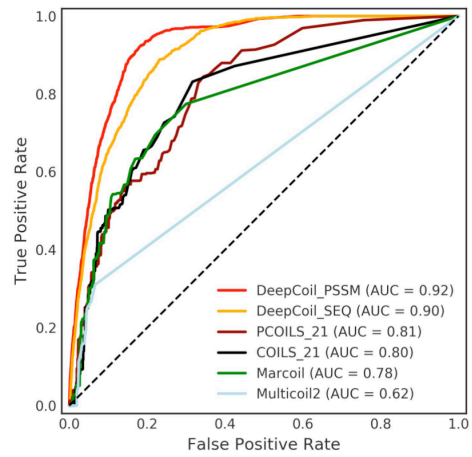

**Supplementary Figure 2.** Performance of per-residue predictions of non-canonical coiled coils with the aid of **(A)** test set #1 (defined in this study) and **(B)** test set #2 (defined based on the work of (Li *et al.*, 2016)). For clarity, some of the methods were omitted. For all AUC scores see Supplementary Tables 2 and 3.

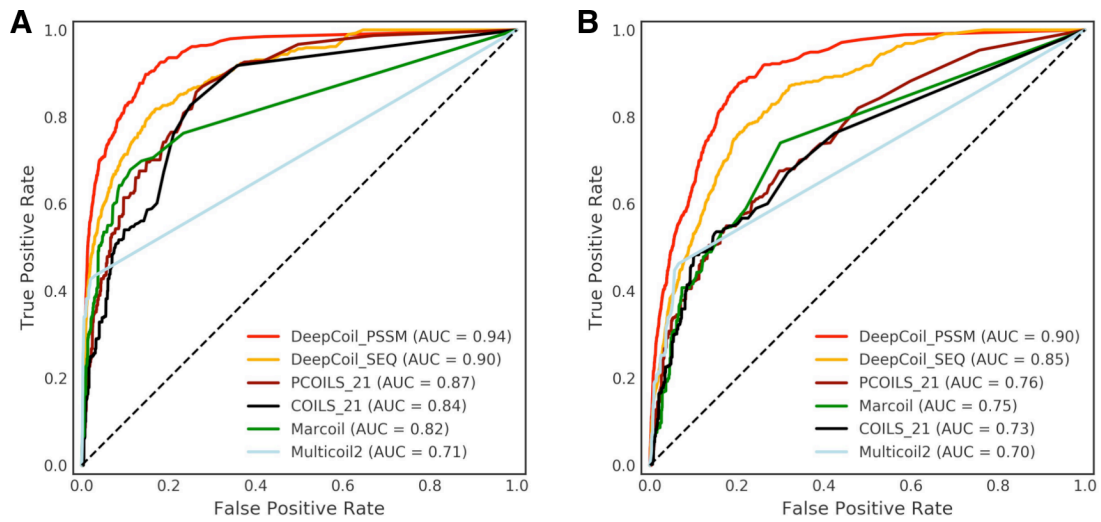

**Supplementary Data 1.** New coiled-coil regions identified in human proteins using DeepCoil\_PSSM. Plots indicate per-residue scores provided by DeepCoil\_PSSM (red) and the maximal score provided by all other methods (blue). The dashed horizontal line indicates the probability threshold used for DeepCoil\_PSSM. Sequences are annotated with the following labels: **NH** – no homologous structure found for the region predicted with DeepCoil; **H+** – homologous structure found and it contains a coiled coil in the prediction region; **H-** – homologous structure found, but it does not contain a coiled coil in the predicted region.

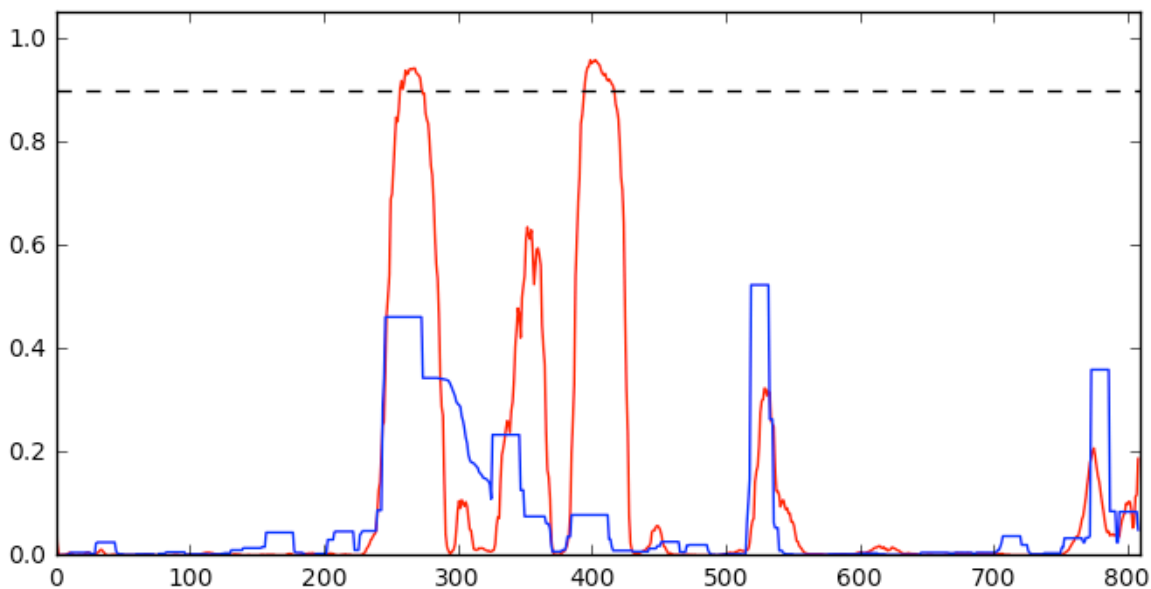

```
>NP_001273685.1 H+
MLRFPTCFPSFRVVGKQLPQEIIFLVWSPKRDIALANTAGEVLLHRLASFHRVWSFPPNENTGKEVTCCLAWRPDGKLL
AFALADTKKIVLCDVEKPELSHSFSVEAPVSCMHWMEVTVESVLTSTFYNAEDESNNLLPKLPTLPKNYSNTSKIIFSEEN
SDEIIKLLGDVRLNILVLGGSSGFIELYAYGMFKIARVTGIAGTCLALCLSSDLKSLSVVTEVSTNGASEVSYFQLETNL
LYSFLPEVTRMARKFTHISALLQYINLSLTCMCEAWEEILMQMDSRLTKFVQEKNTTTSVQDEFMHLLLWGKASAELOTL
LMNQLTVKGLKKGQSIESSYSSIQKLVISHLQSGSESLYHLSELKGMASWKQKYEPLGLDAAGIEEAITAVGSFILKA
NELLQVIDSSMKNFKAFFRWLYVAMLRMTEDHVLPELNKVMQDKDITFVAEFLTEHFNEAPDLYNRKGKGFNVERVGQYL
KDEDDDLVSPNTEGNQWYDFLQNSSHLKESPLLFPYYPBRKSLHFVKRRMENIIDQCLQKPADVIGKSMNQAICIPLYRD
TRSEDSTRRLFKFPFLWNNKTSNLHYLLFTILEDLSLYKMCILRRHTDISQSVSNGLIAIKFGSFTYATTEKVRRSIYSCL
DAQFYDDETVTVLKDVTGREGDRLLVQLPLSLVYNSEDSAEYQFTGTYSTRLDEQCSAIPTRTMHFEEKHWRLLESMDKA
QYVAGNGFRKVCVLSNLRHVRVFEMDIDDEWELDESSDEEEEEASNPKVVKIKEEVLSESEEAENQQAGAAALAPEIVIKV
EKLDPELDS
```

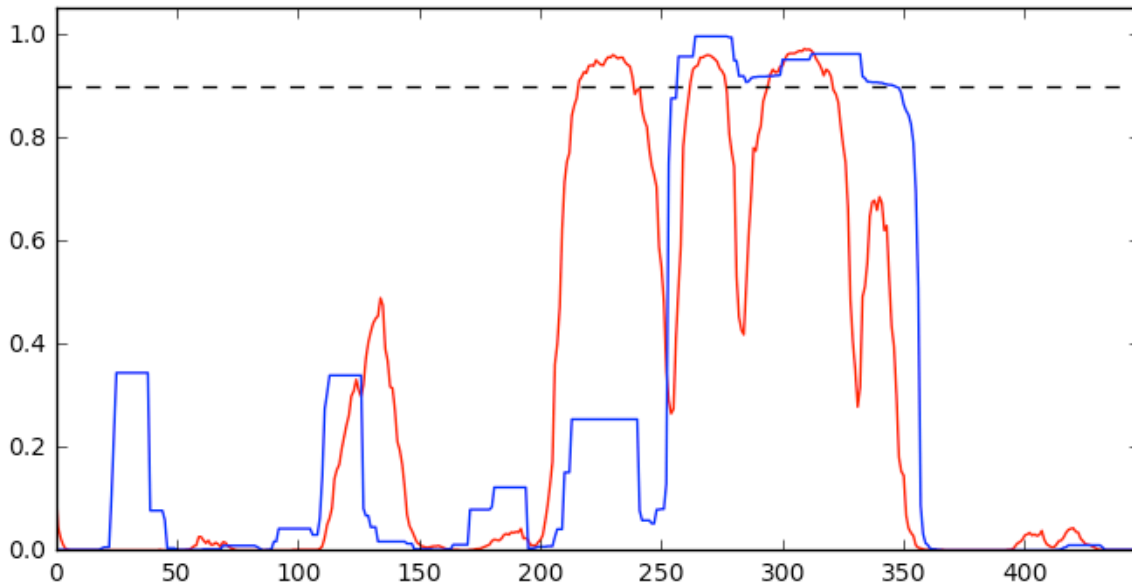

>XP\_024304185.1 H+

MET~~Y~~A~~E~~V~~G~~K~~E~~G~~K~~P~~S~~C~~A~~S~~V~~D~~L~~Q~~G~~D~~S~~S~~L~~Q~~V~~E~~I~~S~~D~~A~~V~~S~~E~~R~~D~~K~~V~~K~~F~~T~~V~~Q~~T~~K~~S~~C~~L~~P~~H~~F~~A~~Q~~T~~E~~F~~S~~V~~V~~R~~Q~~H~~E~~E~~F~~I~~W~~L~~H~~D~~A~~Y~~V~~E~~N~~E~~E~~Y~~  
 A~~G~~L~~I~~I~~P~~P~~A~~P~~P~~R~~P~~D~~F~~E~~A~~S~~R~~E~~K~~L~~Q~~K~~L~~G~~E~~G~~D~~S~~S~~V~~T~~R~~E~~E~~F~~A~~K~~M~~K~~Q~~E~~L~~E~~A~~E~~Y~~L~~A~~I~~F~~K~~K~~T~~V~~A~~M~~H~~E~~V~~F~~L~~Q~~R~~L~~A~~A~~H~~P~~T~~L~~R~~R~~D~~H~~N~~F~~F~~V~~F~~  
 L~~E~~Y~~G~~Q~~D~~L~~S~~V~~R~~G~~K~~N~~R~~K~~E~~L~~L~~G~~G~~F~~L~~R~~N~~I~~V~~K~~S~~A~~D~~E~~A~~L~~I~~T~~G~~M~~S~~G~~L~~K~~E~~V~~D~~D~~F~~F~~E~~H~~E~~R~~T~~F~~L~~L~~E~~**Y**H**T**R**I**R**D**A**C**L**R**A**D**R**V**M**R**A**H**K**C**L**A**D  
 D~~Y~~I~~P~~I~~S~~A~~A~~L~~S~~S~~L~~G**T**Q**E**V**N**Q**L**R**T**S**F**L**K**L**A**E**L**F**E**R**L**R**K**L**E**G**R**V**A**S**D**E**D**L**K**L**S**D**M**L**R**Y**M**R**D**S**Q**A**A**K**D**L**L**Y**R**R**L**R**A**L**A**D**Y**E**N**A  
**N**K**A**L**D**K**A**R**T**R**N**R**E**V**R**P**A**E**S**H**Q**Q**L**C**C**Q**R**F**E**R**L**S**D**S**A**K**Q**G**E**P**A**A**P**S**P**S**L**G**P**H**A**L**P**C**P**D**P**H**A**S**S**P**L**Q**S**S**W**T**S**S**P**A**G**S**P**L**F**E**R**  
 I~~S~~L~~S~~W~~Q~~S~~W~~S~~S~~N~~T~~P~~S~~S~~K~~V~~H~~Q~~A~~H~~F~~L~~P~~R~~Q~~Y~~D~~Q~~I~~L~~E~~T~~P~~R~~R~~A~~P~~L~~Q~~H~~P~~Q~~P~~S~~L~~Q

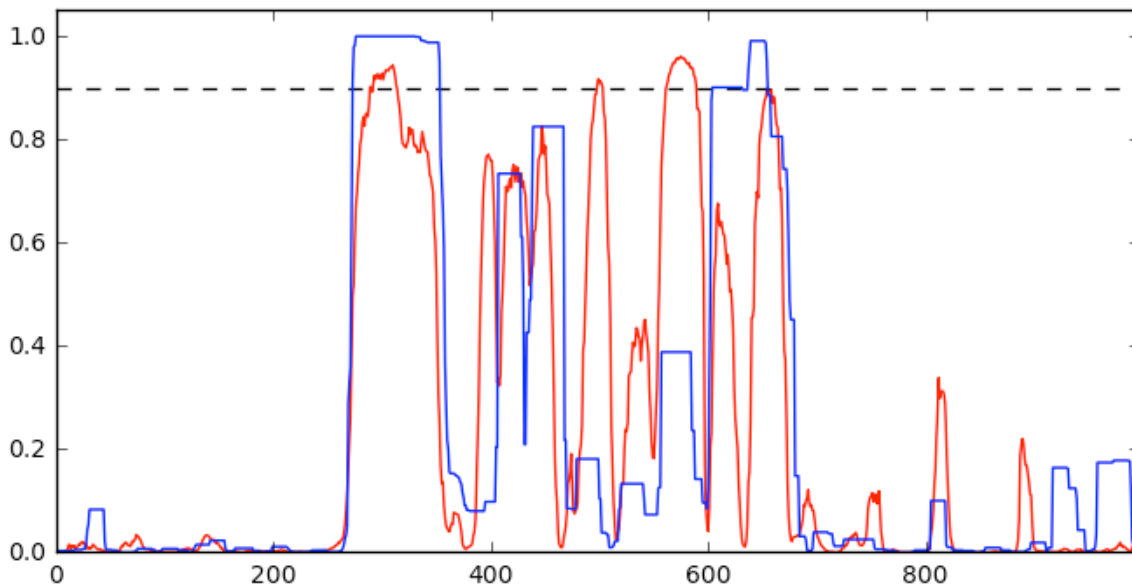

>NP\_001247433.1 NH

M~~E~~D~~T~~H~~Y~~D~~K~~V~~E~~D~~V~~V~~G~~S~~H~~I~~E~~D~~A~~V~~T~~F~~W~~A~~Q~~S~~I~~N~~R~~N~~K~~D~~I~~M~~K~~I~~G~~C~~S~~L~~S~~E~~V~~C~~P~~Q~~A~~S~~S~~V~~L~~G~~N~~L~~D~~P~~N~~K~~I~~Y~~G~~G~~L~~F~~S~~E~~D~~Q~~C~~W~~Y~~R~~C~~K~~V~~L~~K~~I  
 I~~S~~V~~E~~K~~C~~L~~V~~R~~Y~~I~~D~~Y~~G~~N~~T~~E~~I~~L~~N~~R~~S~~D~~I~~V~~E~~I~~P~~L~~E~~L~~Q~~F~~S~~S~~V~~A~~K~~K~~Y~~K~~L~~W~~G~~L~~H~~I~~P~~S~~D~~Q~~E~~V~~T~~Q~~F~~D~~Q~~G~~T~~T~~F~~L~~G~~S~~L~~I~~F~~E~~K~~E~~I~~K~~M~~R~~I~~K~~A~~T~~S~~  
 E~~D~~G~~T~~V~~I~~A~~Q~~A~~E~~Y~~G~~S~~V~~D~~I~~G~~E~~E~~V~~L~~K~~K~~G~~F~~A~~E~~K~~C~~R~~L~~A~~S~~R~~T~~D~~I~~C~~E~~E~~K~~L~~D~~P~~G~~Q~~L~~V~~L~~R~~N~~L~~K~~S~~P~~I~~P~~L~~W~~G~~H~~R~~S~~N~~Q~~S~~T~~F~~S~~R~~P~~K~~G~~H~~L~~S~~E~~K~~M  
 T~~L~~D~~L~~K~~D~~E~~N~~D~~A~~G~~N~~L~~I~~T~~F~~P~~K~~E~~S~~L~~A~~V~~G~~D~~F~~N~~L~~G~~S~~N~~V~~**S**L**E**K**I**K**Q**D**Q**K**L**I**E**N**E**K**L**K**T**E**K**D**A**L**L**E**S**Y**K**A**L**E**L**K**V**E**Q**I**A**Q**E**L**Q**E**K**A  
**A**A**V**D**L**T**N**H**L**E**Y**T**L**K**T**Y**I**D**T**R**M**K**N**L**A**A**K**M**E**I**L**K**E**M**R**H~~V~~D~~I~~S~~V~~R~~F~~G~~K~~D~~L~~S~~D~~A~~I~~Q~~V~~L~~D~~E~~G~~C~~F~~T~~T~~P~~A~~S~~L~~N~~G~~L~~E~~I~~I~~W~~A~~E~~Y~~S~~L~~A~~Q~~E  
 N~~I~~K~~T~~C~~E~~Y**V**S**E**G**N**L**I**A**Q**R**N**E**M**Q**Q**K**L**Y**M**S**V**E**D**F~~I~~L~~E~~V~~D~~E**S**S**L**N**K**R**L**K**T**L**Q**D**L**S~~V~~S~~L~~E~~A~~V~~Y~~G~~Q~~A**E**K**A**N**S**D**E**I~~L~~K~~K~~F~~Y~~D~~W~~K  
 D~~K~~R~~E~~E~~F~~T~~S~~V~~R~~S~~E~~T~~D~~A~~S~~L~~H~~R~~L~~V~~A~~W~~F~~Q~~R~~T~~L~~K~~V~~F~~D~~L~~S~~V~~E~~G~~L~~I~~S~~E~~D~~A~~M~~N~~D~~I~~E~~I~~L~~E~~K~~T~~E~~S~~S~~V~~C~~K~~E~~L~~I~~A~~L~~V~~D~~Q~~G~~D~~A~~D~~K~~E~~I~~I~~S~~N  
 T~~Y~~**S**Q**V**L**Q**K**I**H**S**E**R**L**I**A**T**V**Q**A**K**Y**K**D**S**I**E**F**K**Q~~L~~I~~E~~Y~~L~~N~~K~~S~~P~~S**V**D**H**L**L**S**I**K**K**T**L**K**S**L**K**A**L**L**R**W**K**L**V**E**K**S~~N~~L**E**S**D**D**P**D**G**S**Q**  
**I**E**K**I**K**E**I**T**Q**L**R**N**N**V**F**Q**E**I~~Y~~H~~E~~R~~E~~E~~Y~~E~~M~~L~~T~~S~~L~~A~~Q~~K~~W~~F~~P~~E~~L~~P~~L~~H~~P~~E~~I~~G~~L~~L~~K~~Y~~M~~N~~S~~G~~L~~L~~T~~M~~S~~L~~R~~D~~L~~L~~D~~A~~E~~P~~M~~K~~E~~L~~S~~S~~K~~R  
 P~~L~~V~~R~~S~~E~~V~~N~~G~~Q~~I~~I~~L~~L~~K~~G~~Y~~S~~V~~D~~V~~D~~T~~E~~A~~K~~V~~I~~E~~R~~A~~A~~T~~Y~~H~~R~~A~~W~~R~~E~~A~~E~~G~~S~~G~~L~~L~~P~~L~~I~~F~~L~~F~~L~~C~~K~~S~~D~~P~~M~~A~~Y~~L~~M~~V~~P~~Y~~P~~R~~A~~N~~L~~N~~A~~V~~Q~~A~~N~~  
 M~~P~~L~~N~~S~~E~~E~~T~~L~~K~~V~~M~~K~~G~~V~~A~~Q~~L~~H~~T~~L~~H~~K~~A~~D~~I~~H~~G~~S~~L~~H~~Q~~N~~N~~V~~F~~A~~L~~N~~R~~E~~Q~~I~~V~~G~~D~~F~~D~~F~~T~~K~~S~~V~~S~~Q~~R~~A~~S~~V~~N~~M~~M~~V~~G~~D~~L~~S~~L~~M~~S~~P~~E~~L~~K~~M~~G~~K  
 P~~A~~S~~P~~G~~S~~D~~L~~Y~~A~~G~~C~~L**L**L**L**W~~S~~V~~Q~~N~~Q~~E~~F~~E~~I~~N~~K~~D~~G~~I~~P~~K~~V~~D~~Q~~F~~H~~L~~D~~D~~K~~V~~K~~S~~L~~L~~C~~S~~L~~I~~C~~Y~~R~~S~~S~~M~~T~~A~~E~~Q~~V~~L~~N~~A~~E~~C~~F~~L~~M~~P~~K~~E~~Q~~S~~V~~P~~N~~P  
 E~~K~~D~~T~~E~~Y~~T~~L~~Y~~K~~K~~E~~E~~E~~I~~K~~T~~E~~N~~L~~D~~K~~C~~M~~E~~K~~T~~R~~N~~G~~E~~A~~N~~F~~D~~C~~

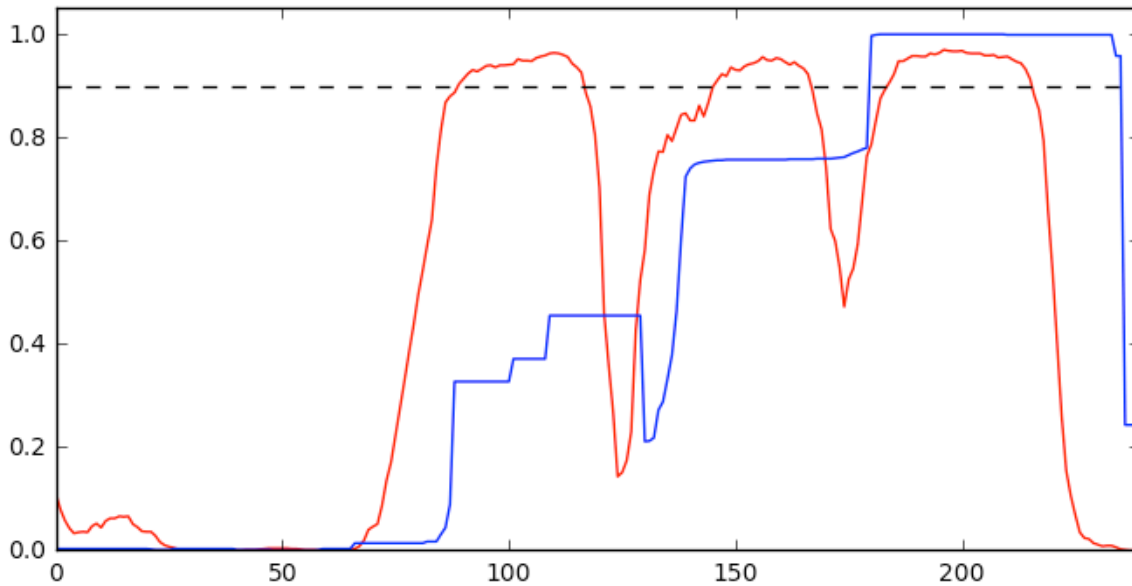

>NP\_063940.1 H+

MAALKSWLSRSVTSFFRYRQCLCVPVVFANFKKRCFSELIRPWHKTVTIGFGVTLCAVPIAQKSEPHSLSSSEALMRRVSL  
 VTDSTSTFLSQTYYALIEAITEYTKAVYTLTSLYRQYTSLLGKMNSEEEDEVWQVIIGARAEMTSKHQEYLKLETTWMTA  
 VGLSEMAEEAAYQTGADQASITARNHIQLVKLQVEEVHQLSRKAETKLAEAQIEELRQKTQEEGEERAESQEQAYLRED

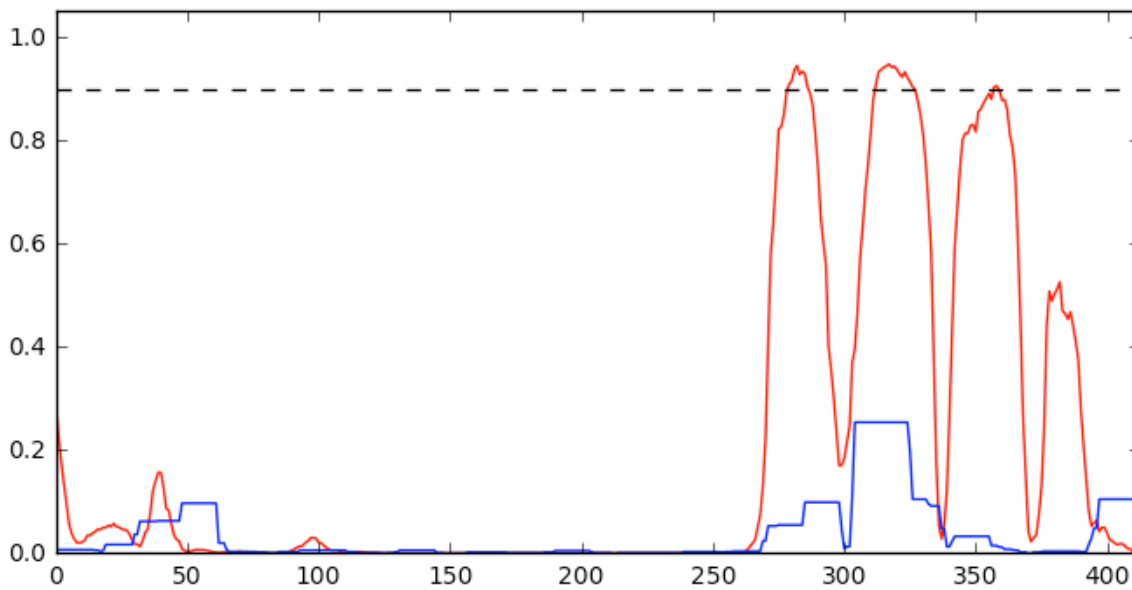

>NP\_000008.1 H+

MAAALLARASGPARRALCPRAWRQLHTIYQSVELPETHQMLLQTCRDFAEKELFPIAAQVDKEHLFPAAQVKKMGGLGLL  
 AMDVPEELGGAGLDYLAYAIAMEEISRGCASTGVIMSVNNSLYLGPILKFGSKEQKQAWVTPFTSGDKIGCFALSEPGNG  
 SDAGAASTTARAEGDSWVLNGTKAWITNAWEASA AVVFASTDRALQNKGISAF LVPMPPTGLTLGKKEDKLGIRGSSTAN  
 LIFEDCRIPKDSILGEPGMGFKIAMQTLDMGRIGIASQALGIAQTALDCAVNYAENRMAFGAPLTKLQVIQF**KLADMALA**  
**LESARLL**TWRAAMLKDNKKPFIKEAAMAKLAASEAATAISHQAIQILGGMGYVTEMPAERHYRDARITEIYEGTSEIQRL  
 VIAGHLLRSYRS

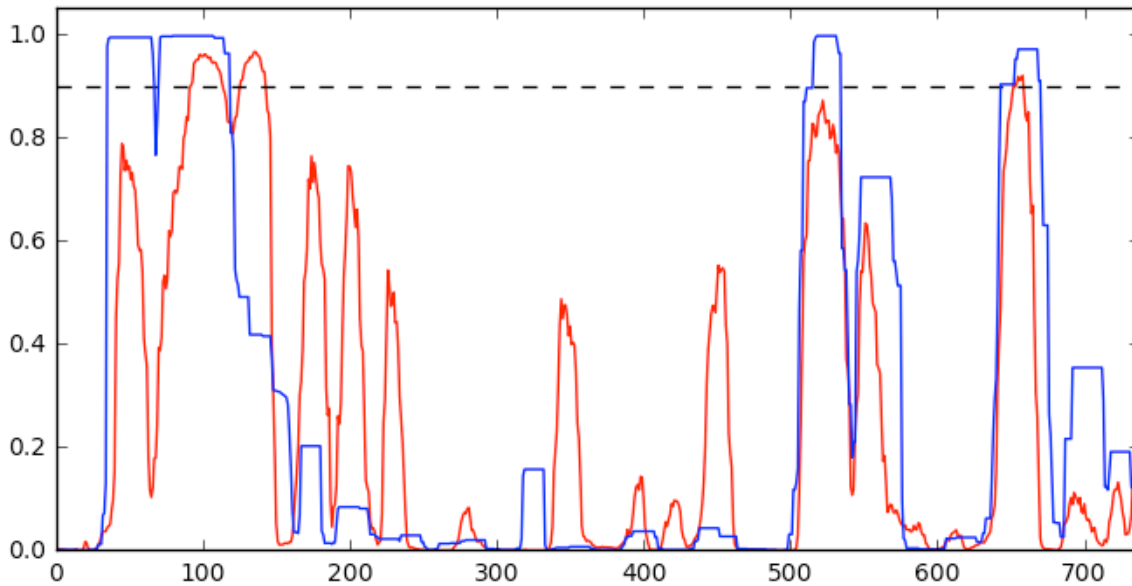

>NP\_001138508.1 H+

MEKSRMNLPGKPD TLCFDKDEFMKEDFDVDHFVSD **CRKRVQLEELRDDLELYKLLKTAMVELINKDYADFVNLSTNLVG**  
**MDKALNQLSVPLGQLREEVLSLRSSVSEGIRAVD**ERMSKQEDIRKK**KMCVLRLLIQVIRSV**EKIEKILNSQSSKETSAL  
 SSPLLTGQILERIATEFNLQFHAVQSKGMPLLDKVRPRIAGITAMLQQSLEGLLLEGLQTSVDVIIRHCLR  
 TYATIDKTRDAEALVGQVLVKPYIDEVIEEQFVESH  
 PNLQVMYNKLLFVPHHCRLRLREVTGGAISS  
 SEKNTVPGYDFLVNSVWPQIVQGLEEKLP  
 SLFNPGNPDAFHEKYTISMDFVRRLERQCG  
 SQASVKRLRAHPAYHSFNKKWNLVYFQIR  
 FREIAGSLEAALTVDVLEDAPAESPYCL  
 LASHRTWSSLRRCWSDMFLPLLVHRLWRL  
 TLQILARYSVFVNELSLRPISNESPK  
 EIKKPLVTSKEPSITQGNTEQSGSPSETK  
 PVS**ISRTQLVYVVADLDKLEQLPELLEI**  
 IKPKLEMIGFKN**FSSISALED**SQSSFS  
**ACVPSLSKIIQ**DLSDSCFGFLKSALE  
 VPRLYRRTNKEVPTTASSYVDSALKPL  
 FQLQSGHKDKLKQAI IQQWLEGLTSE  
 ST**HKYYETVSDV**LN**SVK**MEESLRLKQ  
 ARKTPANPVGPGSGMSDDDKIRLQLAL  
 DVEYLGEQIQKLGQLQASDIKSFSA  
 LAELVAAAKDQATAEQP

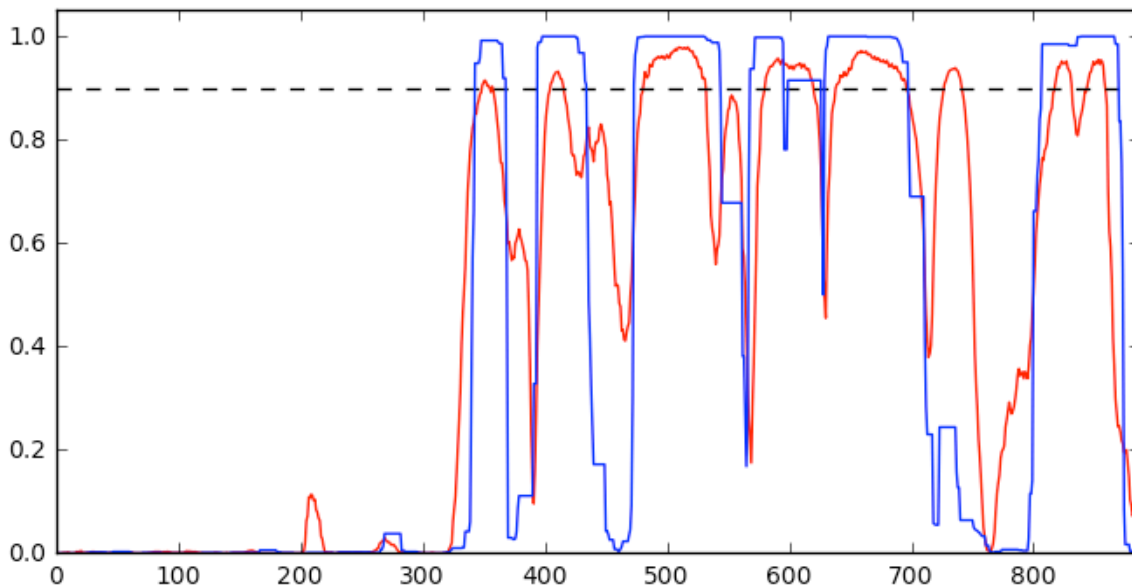

>NP\_001158009.1 NH

MPGGGPQGAPAAAGGGGVSHRAGSRDCLPPAACFR  
 RRRRLARRPGYMRSSSTGPGIGFLSPAVGTLFR  
 FPGGVSGEESHSESRARQCGLDSRGLLVRSPV  
 SKSAAAPT VTSVRGTS AHFGIQLRGGTRL  
 PDRLSWPCGPGSAGWQOEFAMDSSETLDASW  
 EAACSDGARRVRAAGSLPSAELSSNSCSPGCG  
 PEVPTPPGSHSAFTSSFSFIRLSLGSAGERGE  
 AEGCPPSREAESHCQSPQEMGAKAASLDGPH  
 EDPRCLSRPFSLLATRV SADLAQAARNSSRP  
 ERDMHSLPDMDPGSSSLDPSLAGCGGDGSSGS  
 GDAHSWDTLLRKWEPVLRDCL**LRNRRQMEVI**  
**SLRLK**LQKLQEDAVENDDYDKVETGFHYV  
 GQAGLELLTSSNPP**PASASQS**  
**AGITAE**T**LQOR**LE**LE**QEKISLHFQLPSRQ  
 PALSSFLGHLAAQVQAALRRGATQQASGDDT  
 HTPLRMEPRLLE**PTAQDSL**  
**HVSITRRDWLLQEKQQLQKEIEALQARMFV**  
**LEAKDQQLRREIEEQEQQLQWQ**CDL**TPLV**  
**QLSLGLQEVSKALQDTLA**  
**SAGQIPFHA**EP**PETIRSLQERIKSLNLSL**  
**KEITTKVCMSEKFCSTLRK**KVNDI**ETQL**  
**PALLEAKMHAISGNHFWTAKDLT**



EEIRSLTSEREGLEGLLSKLLVLSSRNVKLGSVKEDYNRLRREVEHQETAYETSVKENTMKYMETLKNKLCSCCKPLLK  
 KVWEADLEACRLLIQSLQLEARGSLSVEDERQMDDEGAAPPPIPPRLHSEDKRKTPLKVLEEWKTHLIPSLHCAGGEQK  
 EESYILSAELGEKCEDIGKLLYLEDLQHTAIHSHDEDLIQSLRRELQMVKETLQAMILQLQPAKEAGEREAAASCMTAG  
 VHEAQA

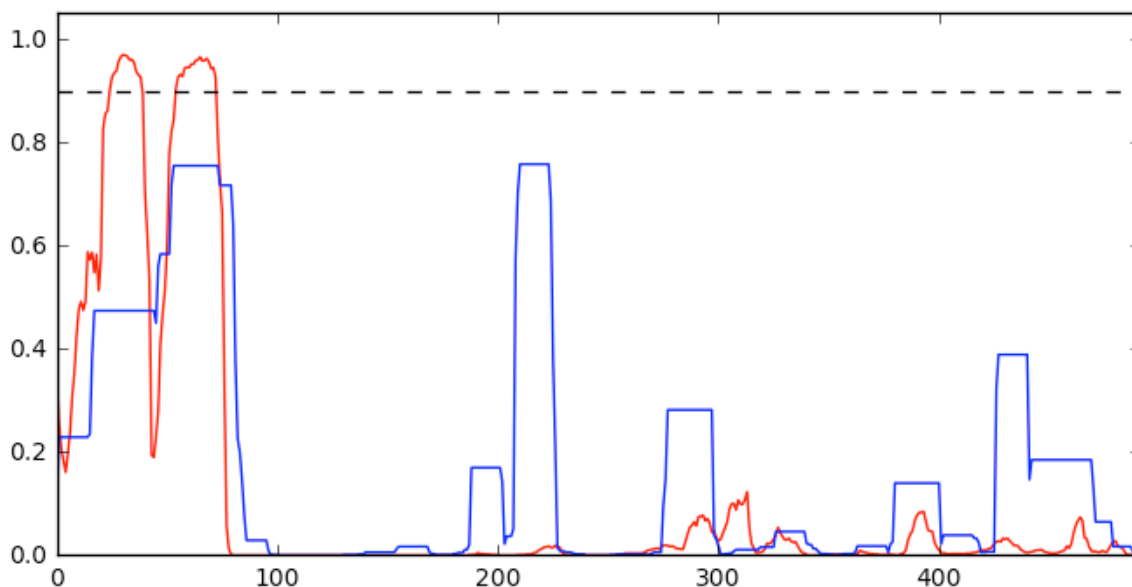

>NP\_008975.1 H+  
 MSLLMISENVKLAREYALLGNYDSAMVYYQGVLDQMNKYLYSVKDTYLQOKWQVWQEIINVEAKHVKDIMKTLESFKLDS  
 TPLKAAQHDLPASEGVEVWSPVPVERRPSPGPRKRQSSQYSDPKSHGNRPSTTVRVHRSSAQNVHNDRGKAVRCREKKEQ  
 NKGREEKNKSPAAVTEPETNKFSTGYDKDLVEALERDIISQNPVNRWDDIADLVEAKKLLKEAVVLPMMPEFFKGIRR  
 PWKGVLMVGPPTGKTLAKAVATECKTTFNVSSTLTSKYRGESEKLVLLFEMARFYSPATIFIDEIDSICSRGTS  
 EEHEASRRVKAELLVQMDGVGGTSENDDPSKMVMVLAATNFPWDIDEALRRRLEKRIYIPLPSAKGREELLRISLRELEL  
 ADDVDLASIAENMEGYSGADITNVCRDASLMAMRRRIEGLTPEEIRNLSKEEMHMPTTMEDEFEMALKKVSXSVSAADIER  
 YEKWIFEFGSC

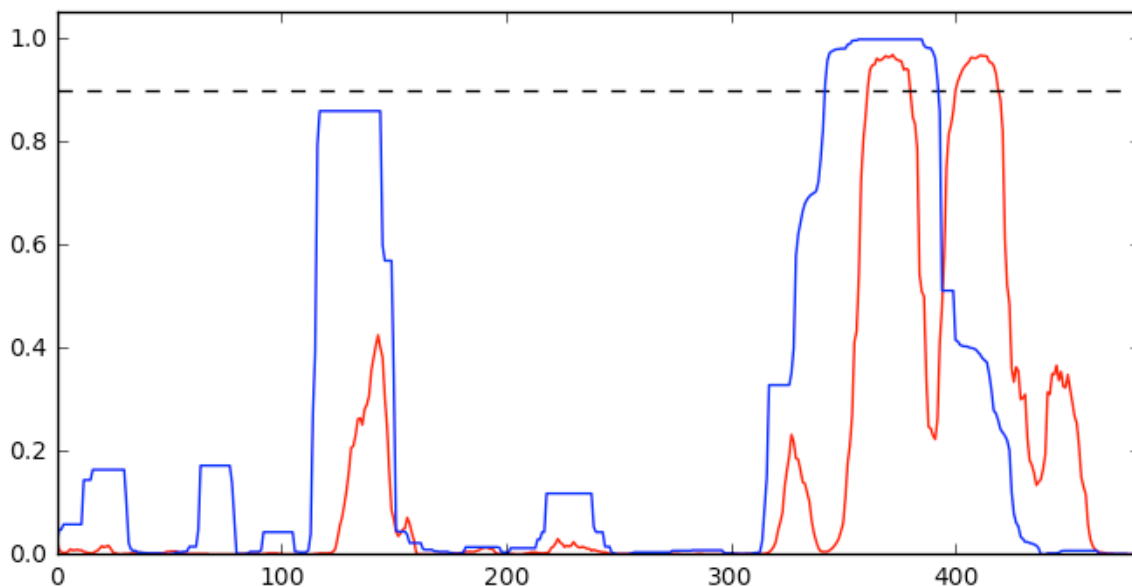

>XP\_016881021.1 NH  
 MNTEAEQQLLHHARNGNAEEVRQLLETMARNEVIADINCKGRSKSNLGTPLHLACYFGHRQVVQDLLKAGAEVNVLNDM  
 GDTPLHRAAFTGRKELVMLLLEYNADTTIVNGSGQTAKEVTHAEERMSLEAVERTQQRKLEELLAAAREGKTTELTAL  
 LNRPNPPDVNCSQDLGNTPLHCAAYRAHKQCALKLLRSGADPNLKNKNDQKPLDLAQAEMKHILVGNKVIYKALKRYEG  
 PLWSSRFFGWRLFWVVLHGVLSWYRKQPDVHNIYRQGCKHLTQAVCTVKSTDSCLFFIKCFDDTIHGFRVPKNSLQQ

SREDWLEAI **EEHSAYSTHYCSQDQLTDEEEEDTVSAADLKKSLEKAQSCQQR**LDREISNFLKMIKECDMAKEMLP SFLQK  
**VEVSEASRETCVALTDCLN**LFTKQEGVAVTFRCNKEKPVSFHVLFSRKY LKRNLC TTQGEKGSKTGLWHGVLEERNPDG  
 KQ

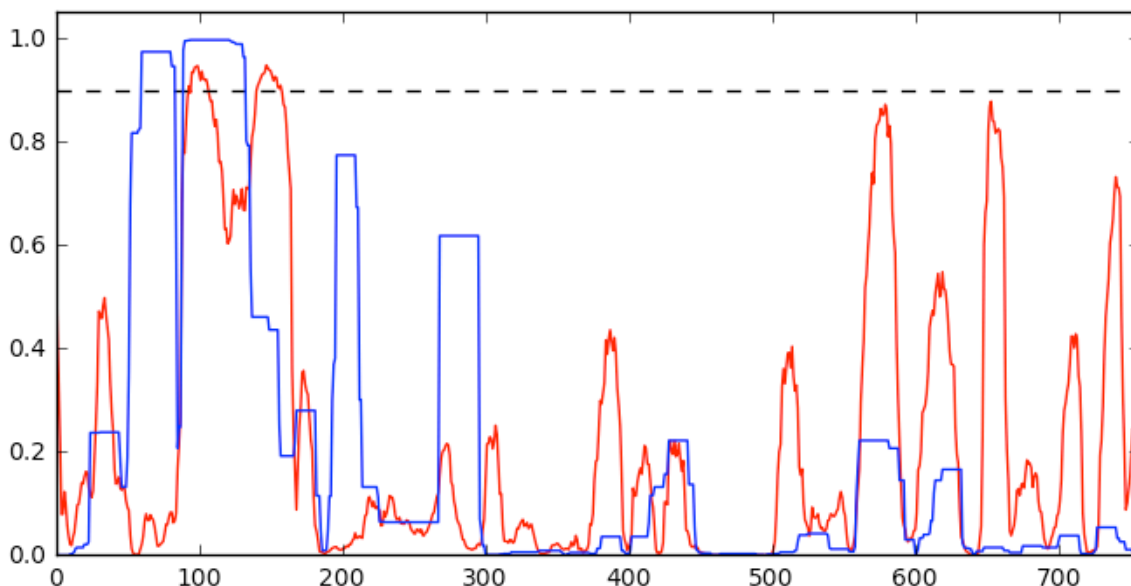

>XP\_016871837.1 H-  
 MCCVGGAGSCSDTGKLGACRAMLEEETDQTYENVLAEIQSFELPVEATLRSV**YDDQPNAHKKFMEKLDACIRNHDKEIEK**  
**MCNFHHQG****FVDAITELLKVRTDAEKLK**VQVTD TNRRFQDAGKEVIVHTEDI IRCRIQQRNI **TTVVEK LQLCLPVLEMYSK**  
 LKEQMSAKRYYSALKTMEQLENVYFPWVSQYRFCQL**MIENLPKLREDIKEIS**MSDLKDFLESIRKHSDKIGETAMKQAQH  
 QKTF SVSLQKQNKMKFGKNMYINRDRI**PEERNETVLKHSLEEEDENEEIILTVQDL**VDFSPVYRCLHIYSVLGDEETFEN  
 YYRKQRKKQARLVLPQSNMHETVDGYRRYFTQIVGFFVVEDHILHVTQGLVTRAYTDELWNMALSKI IAVLRAHSSYCT  
 DPDFLVELEKNLTVI FADTLQYGFVNRFLDLLFEIRDQYNETLLKKWAGVFRDIF EEDNYSPIPVNNEEYKIVISKFP  
 FQDPDLEKQSFPPKFPMSQSVPHIYIQVKEFIYASLKFSESLHRSSTEIDDMLRKSTNLLLTRTLSSCLLNLIRKPHIGL  
 TELVQIIINTHLEQACKYLEDFITNITNISQETVHTTRLYGLSTFKDARHAAEGE IYTKLNQKIDEFVQLADYDWTMSE  
 PDGRASGYLMDLINFLRSIFQVFTHLPGKVAQTACMSACQHLSTSLMQMLLDSELKQISMGAVQQFNLDVIQCELFASSE  
 VVPGFQGD TLQLAFIDLRQECLFALKQPILRKILPW

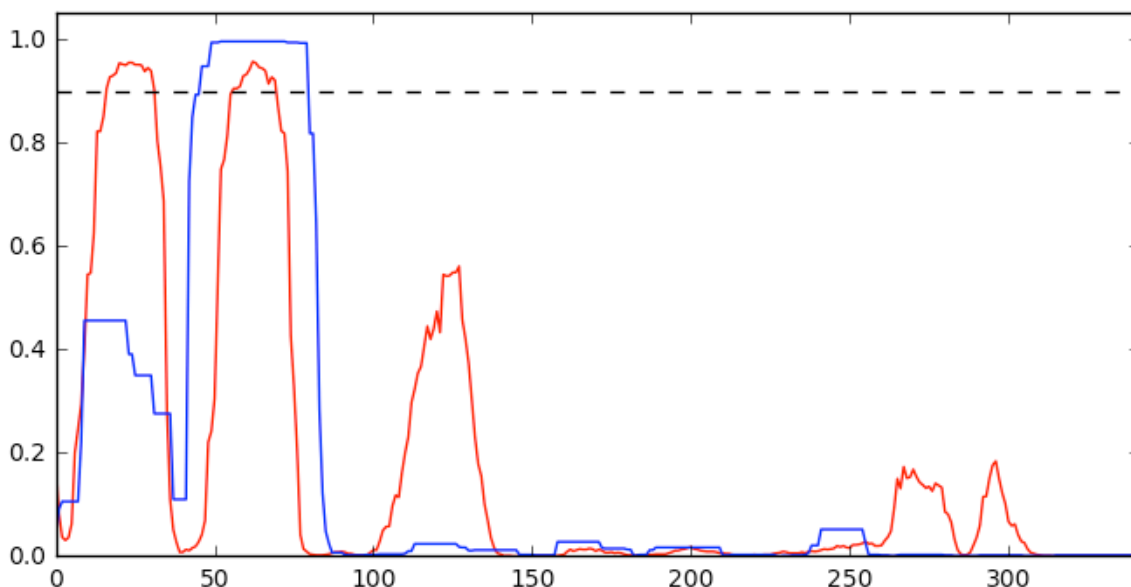

>XP\_016870818.1 NH  
 MADVINSVNLEAFSQ**AISAIQALRSSVSRVF**DCLKDGM RNK**ETLEGREKAFIAHFQDNLH SVNRDLNELERL**SNLVGKP  
 SENHPLHNSGLLSLDPVQDKTPLYSQLQAYKWSNKLQYHAGLASGLLNQOQLKRSANQMGVSAKR RPKAQPTTLVLPPQ

YVDDVISRIDRMFPMSIHLSRPNGTSAMLLVTLGKVLKVIIVMRSFLIDRTIVKGYNENVYTEDGKFFLCVKRSFDVLV  
 FALRTDVSVLKQLVICKLDIWSKSNYQVFQKVTDHATTALLHYQLPQMPDVVVRSFMTWLRSYIKLQAPCQRCGKFLQD  
 GLPPTWRDFRTLEAFHDTCRQ

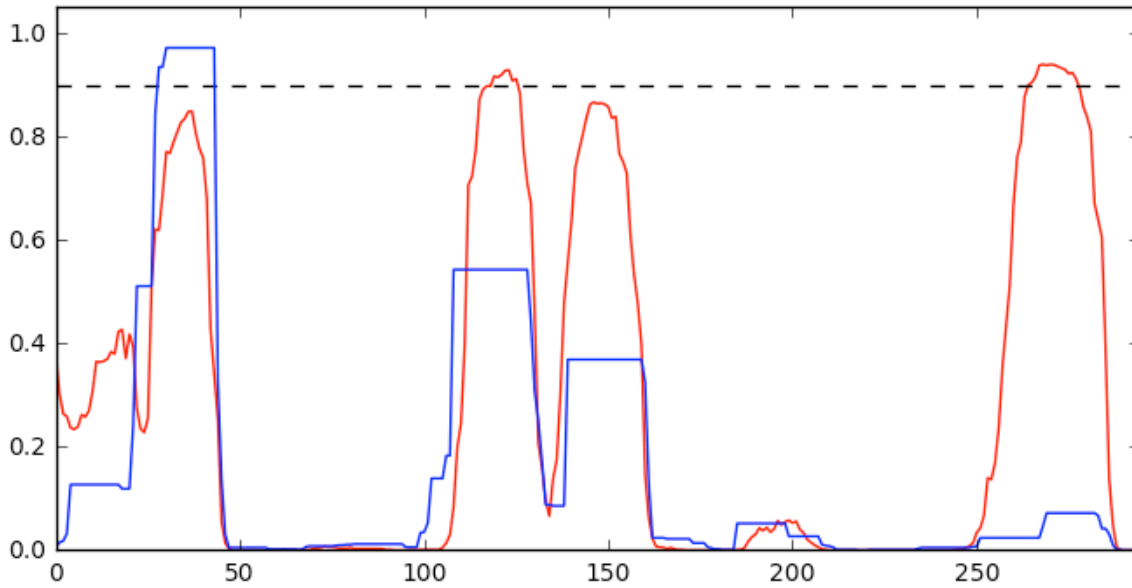

>XP\_006721010.1 H+  
 MATVMAATAAERAVLEEEFRWLLHDEVHAVLKQLQDILKEASLRFTLPGSGTEGPAKQENFILGSCGTDQVKGVLTLOGD  
 ALSQADVNLKMPRNNQLLHFAFREDKQWKLQIQDARNHVSQAIYLLTSRDQSYQFKTGAEVLKLMDAVMLQLTRARNRL  
 TTPATLTLPEIAASGLTRMFAPALPSDLLVNVYINLNKLCCLTVYQLHALQPNSTKNFRPAGGAVLHSPGAMLDPLTAHSE  
 WGSQRLEVSHVHKVECVIPWLNDALVYFTVSLQLCQQLKDKISVFSSYWSYRPF

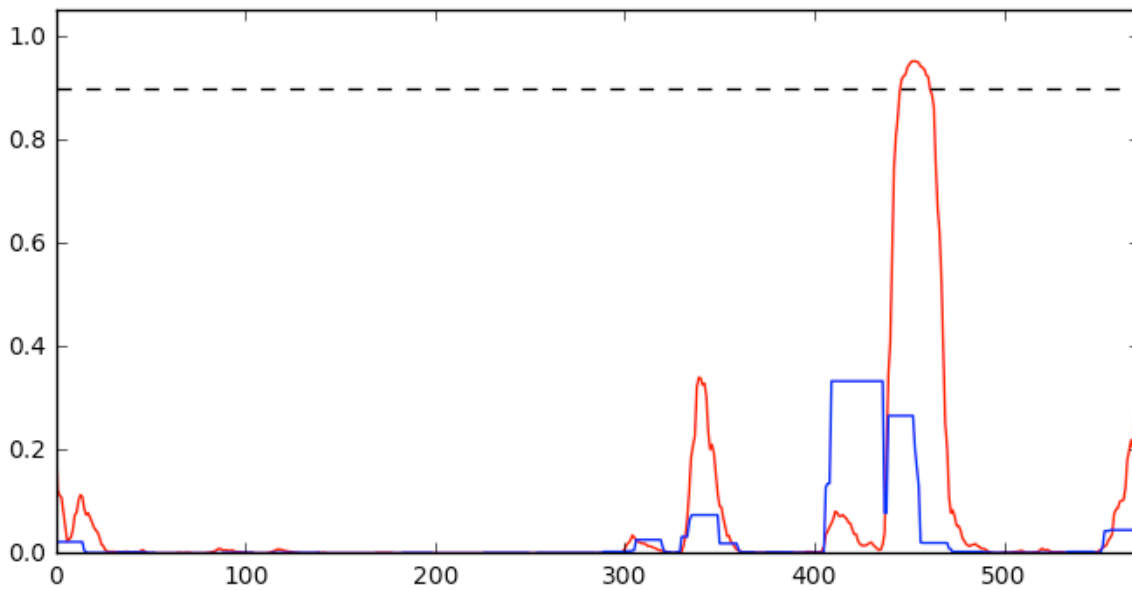

>XP\_016868700.1 H-  
 MDSLCKHLKPVQMLLPQVAVKTEPMSSSETASTTADGSLNFFSGSAIGSSSFSPRPTHQFSPQQIYPSNRYPHILPTP  
 SSQTMAAAYGQTQFTTGMQQATAYATYPQPGQPYGISSYGALWAGIKTEGGLSQSQSPGQTGFLSYGTSFSTPQPGQAPYS  
 YQMGGSSFTTSSGIYTGNNSLTNSSGFNSSQQDYPSYPSFGQGQYAQYINSSPYPAHYMTSSNTSPTTPSTNATYQLQEP  
 PSGITSQAVTDPTAEYSTIHPSTPIKDSDSLRRGSDGKSRGRRRNNNPSPPPDSLRFVFIWDLDETIIVFHSLLT  
 GSYANRYGRDPPTS VSLGLRMEEMI FNLADTHLFFNDLEECDQVHIDVSSDDNGQDLSTYNFGTDGFPAAATSANLCLA  
 TGVRRGGVDWMRKLAFRYRRVKEIYNTYKNNVGGLLGPAKREAWLQLRAEIEALD SWLTLAL KALS LIHSRTNCVNILVT  
 TTQLIPALAKVLLYGLGIVFPIENIYSATKIGKESCFERIIQRFGRKVVYVVIIGDGVVEEQGAKKHAMPFWRISSHSDLM  
 ALHHALELEYL

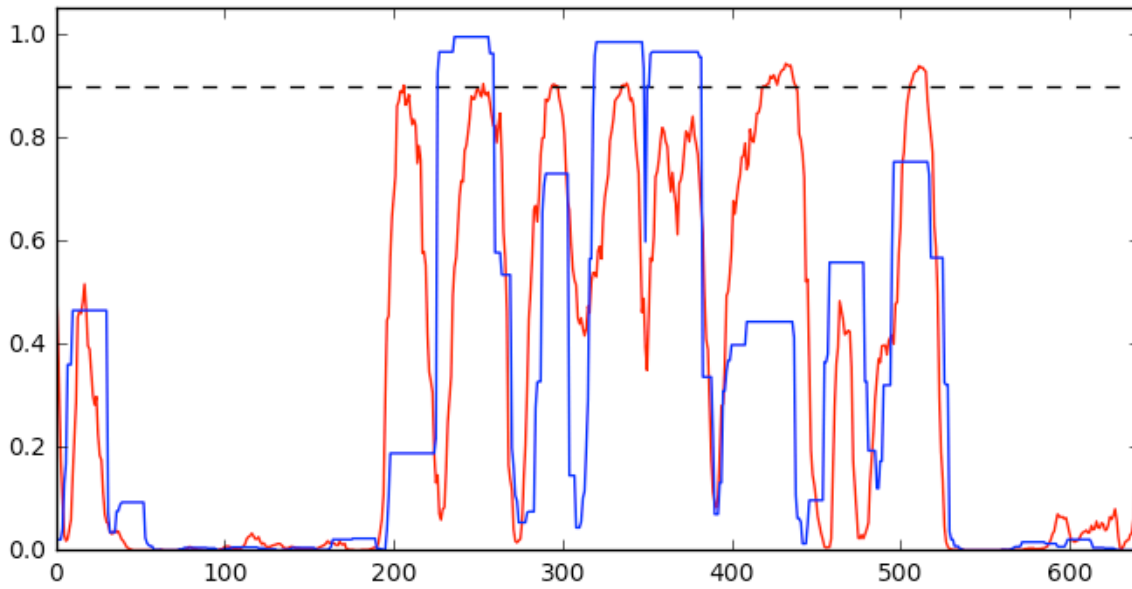

>XP\_016861433.2 H+  
 MLSCLKEEMPPQELTRRLATVITHVDEIMQQEVRPLMAVEIIEQLHRQFAILSGGRGEDGAPIITFPFESGFKHIPDEDF  
 LNVMTYLTSIPSVEAASIGFIVVIDRRRDKWSSVKASLTRIAVAFPGNLQLIFILRPSRFIQRTFTDIGIKYYRNEFKTK  
 VPIIMVNSVSDLHGIDKSQLTRELGGTLEYRHGQWVNHRTAIENFALTLKTTAQMLQTFGSCLATA**AELPRSMLEDLL**  
**MSHTRQRDKLQDEL**KLLGKQGTTLLSCIQEPATKCPNSKLNLNQLENV**TTMERLLVQL**DETEKAFSHFWSEHHLKLN**QCL**  
**QLQHFEDFC**KAKLALDN**LLEEQAFTGIGDSVMHVEQILKEHKKLEEK**SQEPLEKAQLLALVGDQLIQSHHYAADAIRP  
 RCVELRHLCDDFINGNKKKWD**ILGKSLEFHRQLDKVSQW**CEAGIYLLASQAVDKCQSR**EGVDIALNDIATFLGTVKEY**PL  
 LSPKEFYNEFELLT**LDAKAKAQVLQRLDDVQEIF**HKRQVSLMKLAQTRPVQPVAPHPESPKWVSSKTSQPSTSV  
 LARPLRTSEEPYTETELNSRGKEDDETKFEVKSEEIFESHHERGNPELEQQARLGDLSPRRPGVVAQVCNPNTFQHFGR  
 L

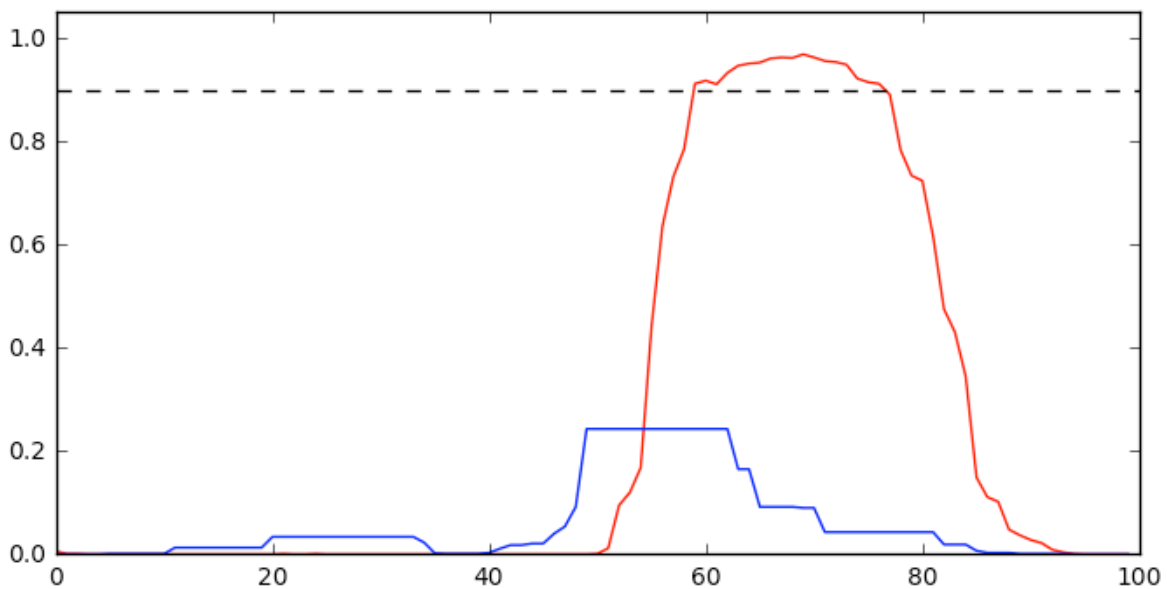

>XP\_016858202.1 H+  
 MPPKFKRHLNDDDDVTGSVKSERNNLEDDSDDEEDFFLRGSPGPRFGPRNDKIKHVQN**QVDEVIDVMQENITKKAYR**IMQ  
 QLLATDPNNFEGKCGGVDAK

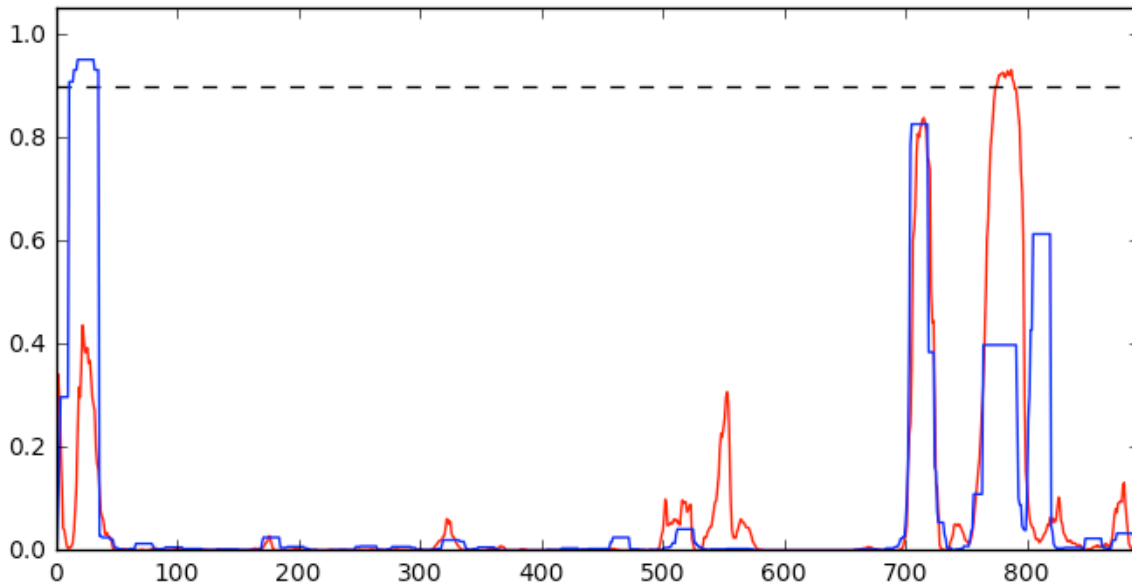

>XP\_011512467.1 H+

MPSLLGAAMP**ASTSAALQEAL**ENAGRLIDRQLQEDRMPDLSSELLMVSAPNNPTVSGMSDMDYPLQGPGLLSVPNLPE  
 ISSIRRVPLPPELVEQFGHMQCNCMMGVFPPIISRAWLTIDSDIFMWNYEDGGDLAYFDGLSETILAVGLVKPKAGIFQPH  
 VRHLLVLATPVDIVILGLSYANLQTGSGVLNDSLGGMQLLPDPLYSLPTDNTYLLTITSTDNGRIFLAGKDGCLYEVAY  
 QAEAGWFSQRCRKINHSKSSLSFLVPSLLQFTFSEDDPILQIAIDNSRNILYTRSEKGVIQVYDLGQDQGMSRVASVSQ  
 NAIVSAAGNIARTIDRSVFKPIVQIAVIENSESLDCQLLAVTHAGVRLYFSTCPFRQPLARPNTLTLVHVRLLPPGFSASS  
 TVEKPSKVHRALYSKGIILMAASENEDNDILWCVNHDTFFPQKPMMETQMTAGVDGHSWALSIDELKVDKIITPLNKDH  
 IPTDSPVVVQQHMLPPKKFVLLSAQGLMFHKLRPVDQLRHLLVSNVGGDGEIEERFFKLHQEDQACATCLILACSTAA  
 CDREVSAWATRAFFRYGGEAQMRFPPTLPPPSNVGPILGSPVYSSSPVPSGSPYPNPSFLGTPSHGIQPPAMSTPVCALG  
 NPATQATNMSCVTGPEIVYSGKHNGICIFYSRIMGNIWDASLVVERIFKSGNREITAIESSVPC**QLLESVLQELKGLQEF**  
 LDRNSQFAGGPLGNPNTTAKVQQRLIGFMRPENGNPQQMQQELQRKFHEAQLSEKIALALWKLCEHQFTI**IVAELQKEL**  
**QEQLKI**TTFKDLVIRDKELTGALIASLINCYIRDNAAVDGISLHLQDICPLLYSTDDAICSKVEKINKSVSHGLPAAQ

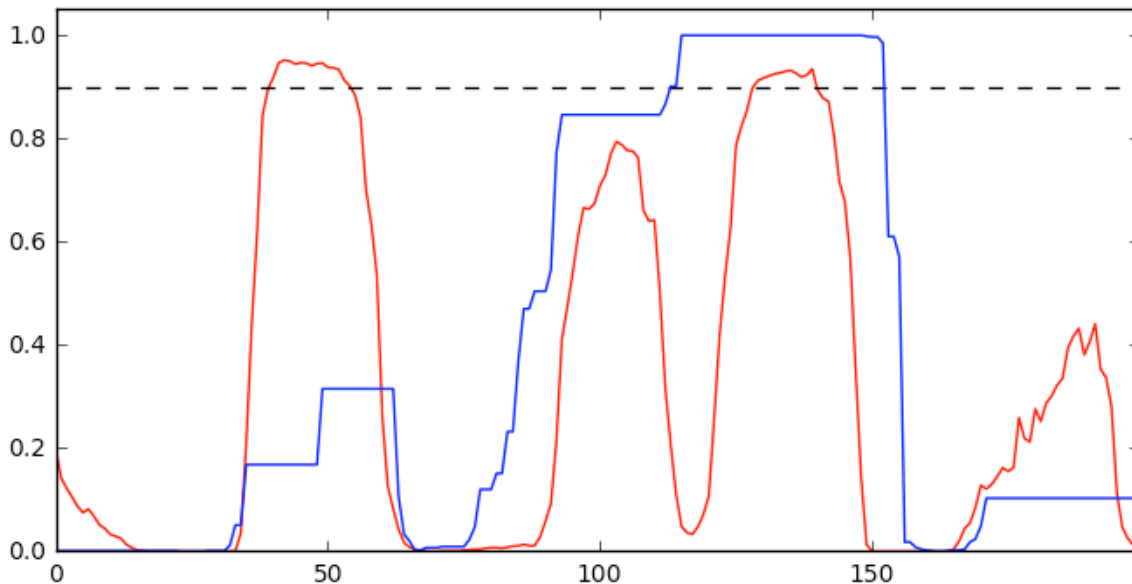

>NP\_000632.1 H+

MNCVCRLVLVLSLWPD TAVAPGPPPGPPRVSPDPRAELD**STVLLTRSL**LADTRQLAAQLRDKFPADGDHNLDSLPTLAM  
 SAGALGAL**QLPGVLR**LRADLLSYLRHVQWLR**RAGGS**SLK**TEPELGT**LQARLD**RLRL**QLLMSRLALPQPPDPFPAPP  
 LAPPSSAWGGIRAAHAILGGLHLLTDWAVRGLLLLLKTRL

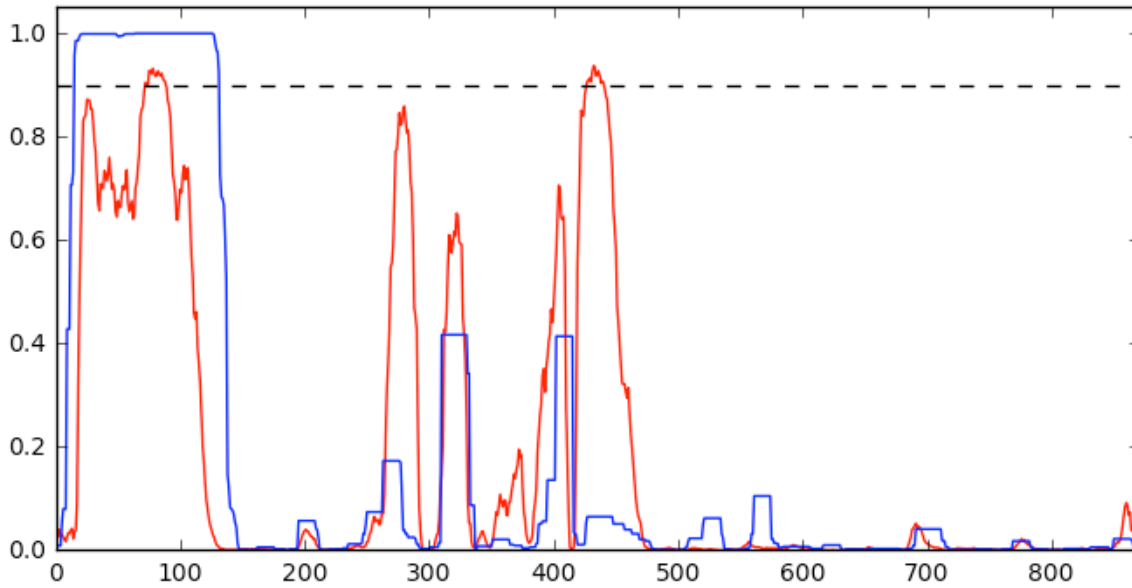

>NP\_001138923.2 H+

MEKTKTKQGENE**HMPVNNPSTQIYQLQALASELKTGFTEAMQELSRIQHGEYALEEKVKSCRCSMEEKVTEMKNSLNYFK**  
**EELSNAMSMIQAITSKQEEMQOKIEQLQOQEKRRRESRKVK**AKKTQKEEHSSQAGPAQAQGSPPFRSINIPEPVLPSDFTNL  
 LPSQAYEKAQESRSVHVGDSNVKGMMPGVNPTTPEAEENLKSCLSADIQSKGHLPSGMWRQPKDGKEWGEEYVTKDHPD  
 KLKEAGQGRHSSLENVLCETSLAAKRQTVALELLESERKYVINISLILKIKATFQGS DGKRN SKERSLFPGLRYLVQQH  
 LDLHALQERVLKWPQGVLDLFLKLTNDENNFLDYVAYLRDLPECISLVHVVLKEGDEEIKSDIYTLFFHIVQRIP  
 EYLIHLQNVLKFTEQEHPDYLLLVCV**QRLRVFISHYTL**LLFQCNEDLLIQKRKLLKSSMAKLYKGLASQCANAGQDASP  
 TAGPEAVRDTGIHSEELLQPYPSAPSSGPAITHLMPPVKKSQQQQSLMESMQPGKPSDWELEGRKHERPESLLAPTQFCA  
 AEQDVKALAGPLQAIPEMDFESSPAEPLGNVERSLRAPAELLPDARGFVPAAYEEFEYGGEIFALPAPYDEEPPQAPALF  
 ENCSPASSESLDICFLRPVSFAMEAERPEHPLQPLPKSATSPAGSSSAYKLEAAAQAHGKAKPLSRSLKEFPAPPADG  
 VAPRLYSTRSSSGGRAPIKAERAAQAHGPAAAVAARGASRTFFPQQRSQSEKQTYLEVRREMHLEDTRFCPKEERESE  
 QTSFSDQNPRQDQKGGFRSSFRKLFKKKSSGSEYREKTNENPSMDPSPTKQDFFRNRLALANDLDQGTAV

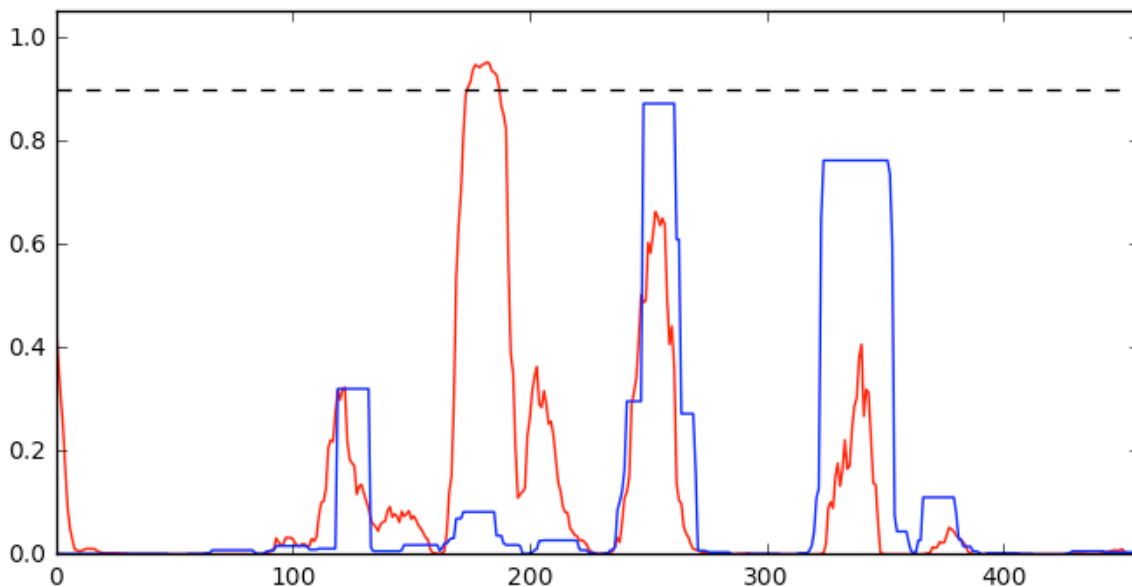

>NP\_001159631.1 H+

MAALRALCGFRGVAAQVLRPGAGVRLPIQPSRGVRQWQPDVEWAQQFGGAVMYPKETAHWKPPPWNVDVDPKDTIVKNI  
 TLNFGPQHAAHGVLRLVMELSGEMVRKCDPHIGLLHRGTEKLI EYKTYLQALPYFDRLDYVSMCNEQAYS LAVEKLLN  
 IRPPPRAQWIRVLF**GEITRLLNHIMAVT**THALDLGAMTPFFWLFEEEREKMF EYERVSGARMHAAYIRPGGVHQDLPLGL  
 MDDIYQFS**KNFSLRLDELELLTN**NRIWRNRTIDIGVVTAAEALNYGFSGVMRLRGSGIQWDLRKTQPYDVYDQVEFDVPV  
 GSR**GDCYDRYLCRVEEMRQSLRI**IAQCLNKMPPEIKVDDAKVSPPKRAEMKTSMESLIHHFKLYTEGYQVPPGATYTAI  
 EAPKGEFGVYLVSDGSSRPYRCKIKAPGFAHLAGLDKMSKGHMLADVVAIIIGTRPIV

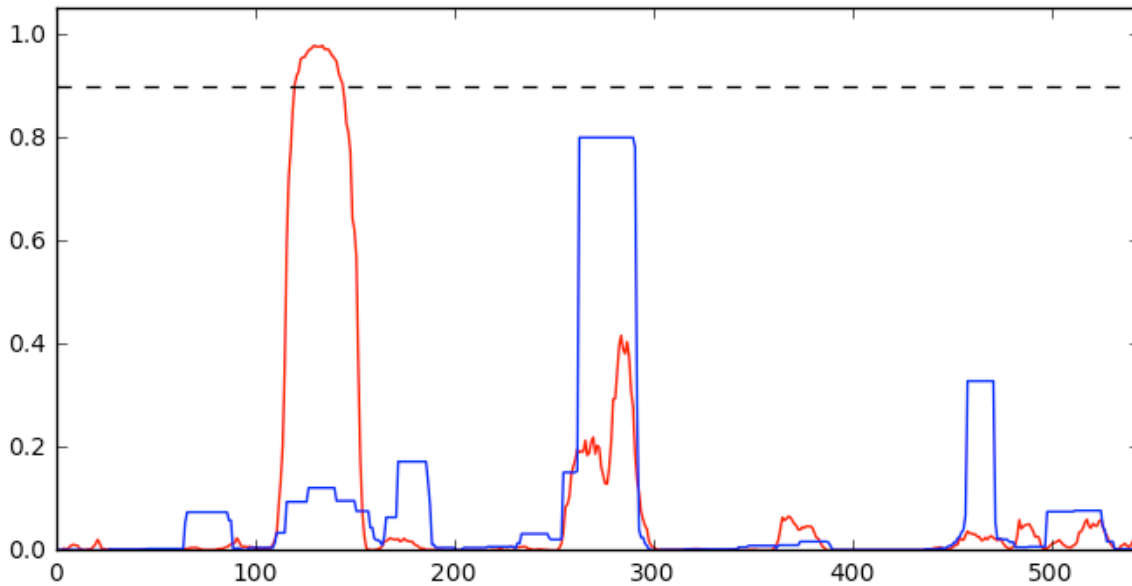

>NP\_001230177.1 H-  
 MRDNTSPISVILVSSGSRGNKLLFRYPFQRSQEHSPASQTSKPRSRYAASNTGDHADEQDGDSTRFSVDVILATILATKSEMC  
 GQKFELKIDNRFVGHPTLLQHALGQANADPSVINCLHNL**SRRIATVLQHEERRCQYLTREAKLILALQ**DEVSAMADGNE  
 GPQSPFHILPKCKLARDLKEAYDSLCTSGVRLHINSWLEVSFCLPHKIHYAASSLIPPEAIERSLKAIRPYHALLLS  
 DEKSLGELPIDCSPALVRVIKT**TSAVKNLQQLAQDADLALLQVFQLAA**HLVYWGKAI I IYPLCENNVYMLSPNASVCLY  
 SPLAEQFSHQFP SHDLPSVLAKFSLPVSLSEFRNPLAPAVQETQLIQMVVWMLQRLLIQLHTYVCLMASPSEEEPRPRE  
 DDVPTARVGGRLSTPNALSFGSPTSSDDMTLTSPSMDNSSAELLPSGDSPLNQRMTENLLASLSEHERAAILSVPAAQ  
 NPEDLRMFARLLHYFRGRHHLEEIMYNENTRRSOLLMLFDKFRSVLVVTTTHEDPVI AVFQALLP

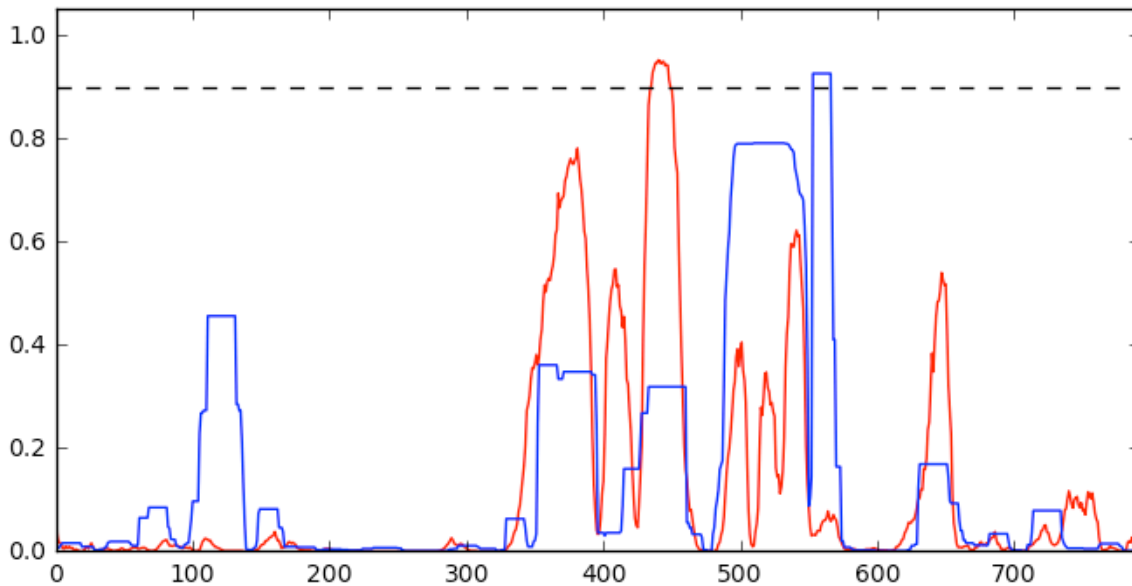

>NP\_001269784.1 NH  
 MSNQQEKYEAQNI VNSTEESDDAFDVTI PVPSEEPQESDQTEEHESGIEQFSESHAIHVEEQSDQSFSSLEPDNEQLME  
 EVISPRQVS YTPQHHEKQYAMQRPNDDSLAF LDKIKSVKESLQESVEDSLATVKVVLIPVQGEI V I PFKVDTILKYLKDH  
 FSHLLGI PHSVLQIRYSGKILKNNETLVQHGVKQEI VQVEI FSTNPDLYPVRRIDGLTDV SQI I T V T V Q T G L D Q Y Q V P  
 VEIVKSDFHK PFLGGFRHKV TGV EYHNAGTQTVPKRI PERLSIFCRDTQT V FQKKNLQQT T N T T S T Q M T N I G V Y V S N M T D  
 KLVTPGKYFSAAEYHAQRLKAVI V I Q T Y Y R Q W H A K I F V E N L R R Q K S L R L E W E T Q Q E L R K I R E K E E W I K L D Y H R R H N P K T N  
 E D F E F L Y N A L E F W R Q E E L T R I N Q S F T G A E R K A A L C E L L E K E T Q I I A S I G R H R Y I A Y M A N Q E A A I Q A F L D K C S A P K I W R T P  
 N G K T I E M D T Q **FTIRARELQNIYKCIMLNISQDERLDVLLTLKHTVKEHECKLTQEILELIDREVDLMMRGVKHHNLEGL**  
**RKRIATLF**FHYIKTPLFNPEVAKYLKVPQDPLKFKYKIIYFCHSCQLYLPSTEFVSSTSRRIYRCRNCINLQNEAQKRES  
 FLKYKCLLQQLLYTEADYEDDSKIAFLMQLQDIQYL TENI WASQSVLSACDNLSDLVMVRWNKSLEWSPWNCILLTKDEA  
 AAHLKLT SIEEGYERSFIHKIKHKHILAKNYFSQVPVLASFILDDGEIDEIRWKYHSDTTPKIIESQRPPH

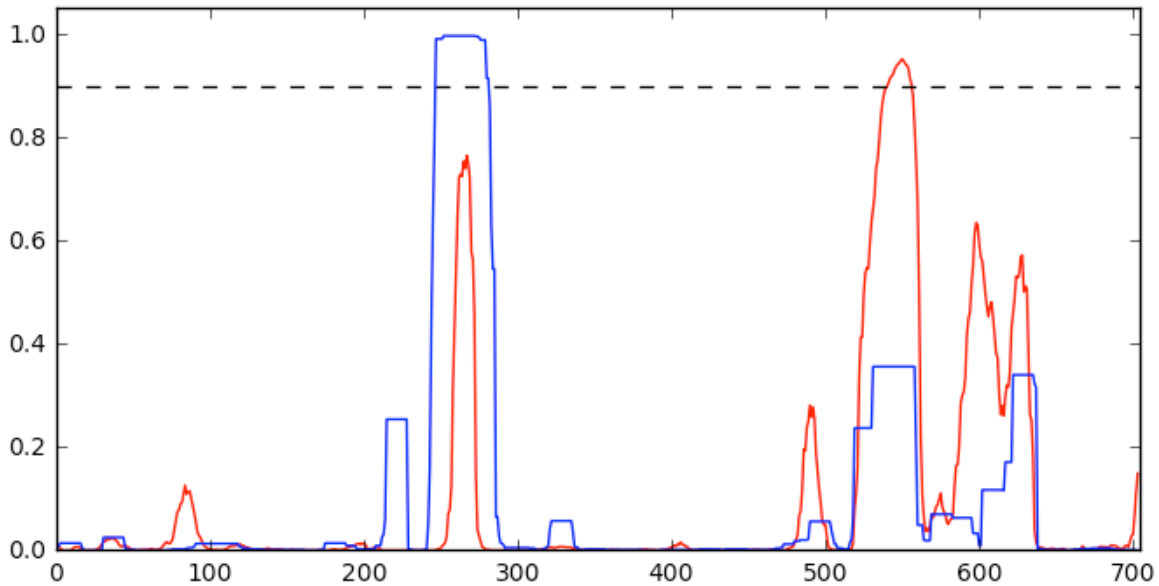

>NP\_001334966.1 NH

MKLMYEHNLQRTACNMTYGSFSGVKGKRDLCIQSMDGMLMVFEQESYAFGRFLPGFLLPGPLAYSSRTDSFLTIVSSCQV  
 ESYKYQVLA FATDADKRQETEQQKLGSGKRLVVDWTLNIGEALDICI VSNQSSASSVFLGERNFFCLKDNGQIRFMKK  
 LDWSPSCFLPYCSVSEGTINTLIGNHNNMLHIYQDVTWKWATQLPHIPVAVRVGCLHDLKGVIVTLSDDGHLQCSYLGTD  
 PSLFQ**APNVQSRELNYDEL DVEMKELQKI IKDVNKS**QGVWPMTEREDDLNVSVVVSPNFDSVSQATDVEVGTDLVPSVTV  
 KVTLQNRVILQKAKLSVYVQPPLELTCQDQFTFEMTPDLTRTVSFSVYLKRSYTPSELEGNVVSYSRPTDRNPDGIPRV  
 IQCKFRLPLKLI CLPGQPSKTASHKITIDTNKSPVLLSLFPGFASQDDDDQVNVMGFHFLLGGARITVLASKTSQRYRIQ  
 SEQFEDLWLI TNELILRLQEYFEKQGVKDFACFSGSIPLQEYFELIDHDFELRINGEKLE**ELLSERAVQFRAIQRRLLA**  
 RFKDKTPAPLQHLDTLLDGTYKQGWEE TVDAAISHLLKTCLSKSSKEQALNLSQLNIPKDTSQLKKHITLLCDRLSKGG  
 RLCLSTDAAPQTMVMPGGCTTIPESDLEERSVEQDSTELFTNHRHLTAETPRPEVSPLOGVSE

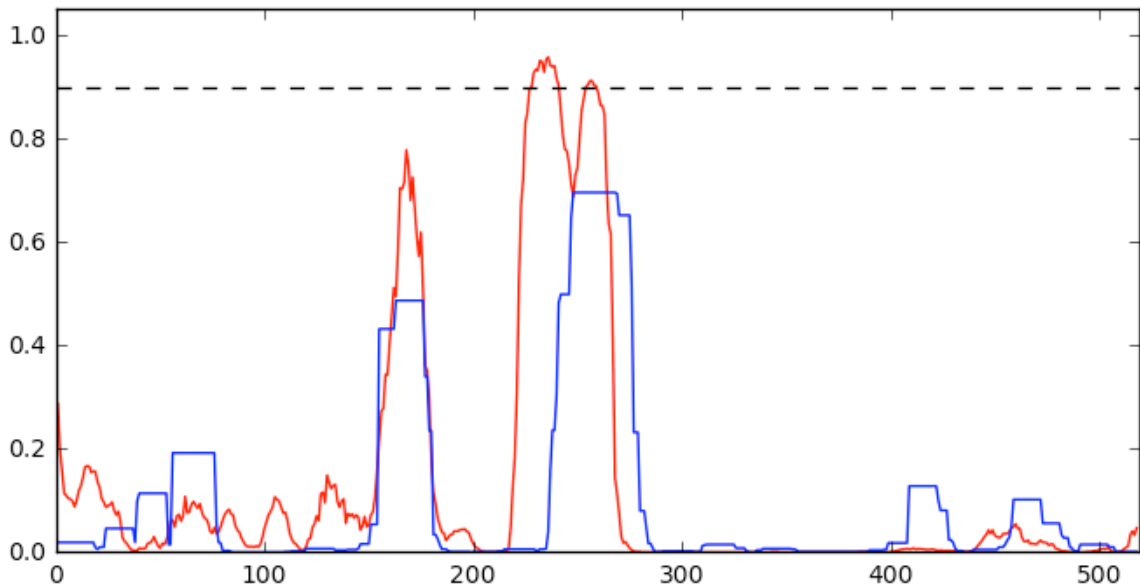

>NP\_001340522.1 H+

MLIVLNSTLKSFDQFTCNLLYVSWRKDLTEHLHRLYFRGRAYYTLNVLRDDIDNPDQIRISQDVERFCRQLSSMASKLIIS  
 PFTLVYYTYQCFQSTGWLGPVSI FGYFILGTVVNKTLMGPIVMKLVHQEKLEGDFRFRKHMQIRVNAEPAAFYRAGHVEHM  
 RTDRRLQRLQOTQRELMSELWLYIGINTFDYLGSI LSYVVI AIPISGVYGDLSPAELSTLVSKNAF**VCIYLI SCFTQL**  
**IDLSTTLSDVAGYTHRIGQLRETTLLDMSLK**SQDCEILGESEWGLDTPPGWPAEAPADTAFLLRVSI SAPSSDKPLIKDL  
 SLKISEGQSLITGNTGTGKTSLLRVLGGLWTSTRGSVQMLTDFGPHGVFLFPQKPFFTDGLTREQVIYPLKEVYPDSGS  
 ADDERILRFLELAGLSNLVARTEGLDQQVDWNWYDVLSPGEMQRLSFARLFYLPKYAVLDEATSALTEEVESELYRIGQ  
 QLGMTFISVGHRSLEKFSLSVLKLCGGGRWELMRIKVE



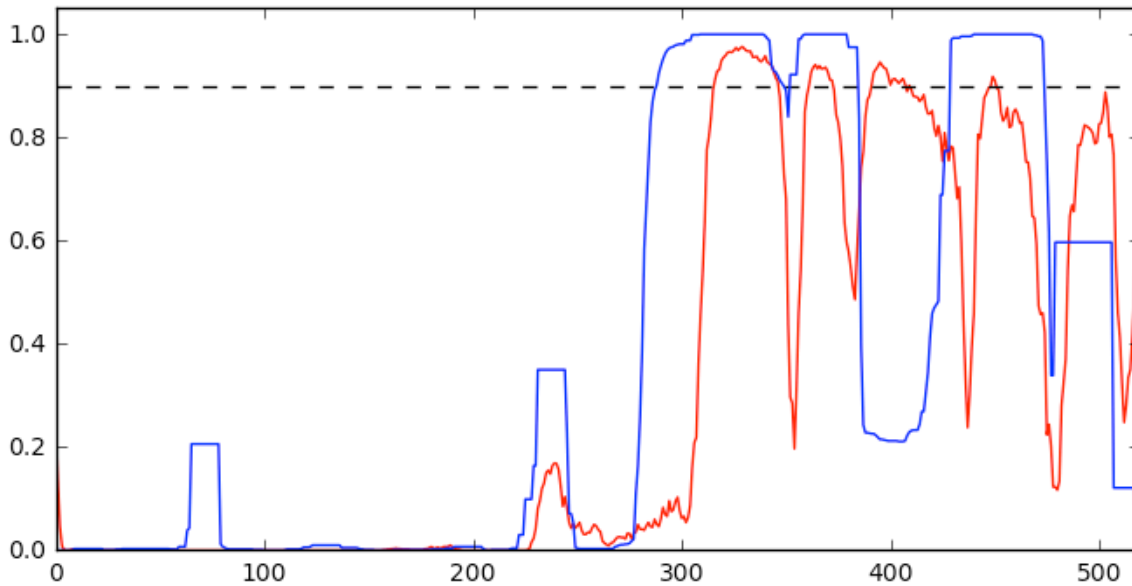

>NP\_003091.2 H+

MAAEREPPPLGDGKPTDFEDLEDGEDLFTSTVSTLESSPSSPEPASLPAEDI SANSNGPKPTEVVLDDDDREDLFAEATEE  
 VSLDSPEREPILSSEPSPAVTPVTPPTTLIAPRIESKMSAPVIFDRSREEIEEEEANGDIFDIEIGVSDPEKVGDMNAYM  
 AYRVTTKTSLSMFSKSEFSVKRRFSDFLGLHLSKASKYLHVGYIVPPAPEKSIVGMTKVKGKEDSSSTEFVEKRRAALE  
 RYLQRTVKHPTLLQDPDLRQFLESSELPRAVNTQALSGAGIL**RMVNKAADAVNKMTIKMNESDAWFEEKQQQFENLDQQL**  
**RKLHVSVEALVCHRKELSANTAFAKSAAMLGNSDHTALSRALSQLAEEVEEKIDQLHQEQAFADFYMFSELLSDYIRLI**  
**AAVKGVFD**HRMKCWQKWEDAQITLL**LKKREAEAKMMVANKPKDIQQAKNEIREWEAKVQQGERDFEQISKTIRKEVGRFEK**  
**ERVKDFKTVI IKYLESLVQTOQQQLIKYWEAFLPEAKAIA**

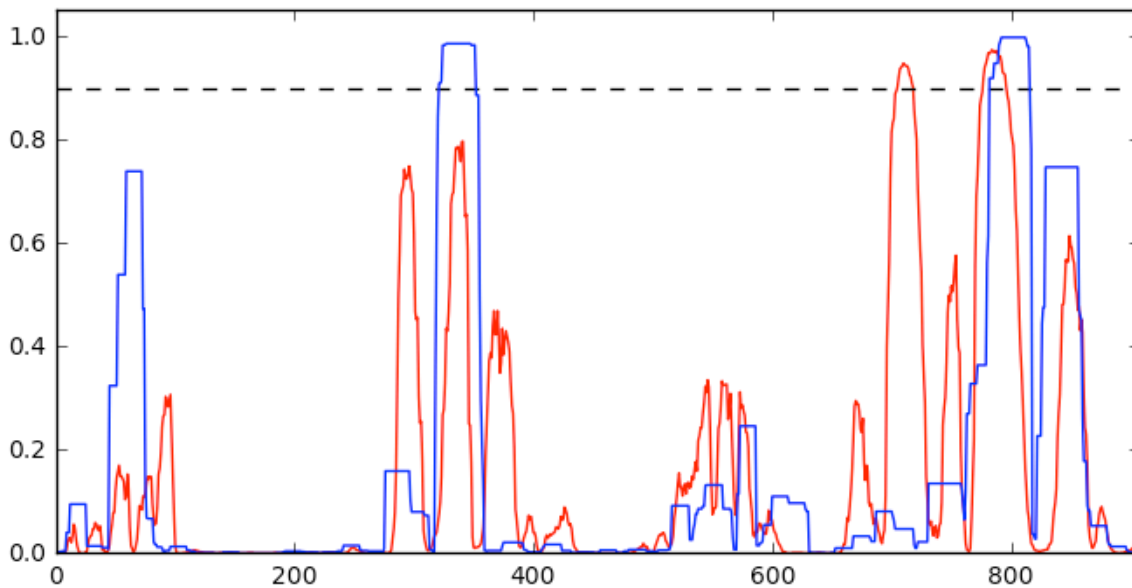

>NP\_006313.1 H+

MATPDQKSPNVLLQNLCCRILGRSEADVAQQFQYAVRVIGSNFAPTVERDEF**LVAEKIKKELIRQPREADAAL**FSELHRK  
 LHSQGVLKNKWSIYLILLSLSEDPRRQPSKVSSYATLFAQALPRDAHSTPYYYARPQTLPLSYQDRSAQSAQSSGSGVSS  
 GISSIGLCAISGPAPAPQSLLPGQSNQAPGVGDCLRQQLGSR LAWLTANQPSSQATTSGKVPSAVSRNMTRSRRREGDTG  
 GTMEITEAALVRDILYVFQIDGKNIKMNNTEENCYKVEGKANLSRSLRDTAVRSELGWLHNKIRRYTDQRSLDRSFGLV  
**GQSFCAALHQELREYYRLLSVLHSQQL**EDDQGVNLGLESSLTLRLLVWTDPKIRLKTALALVDHCQGRKGGELASAV  
 HAYTKTGDPYMRSLVQHILSLVSHPVLSFLYRWIYDGELEDTYHEFFVASDPTVKTDRLWHDKYTLRKSMI PSFMTMDQS  
 RKVLLIGK SINFLHQVCHDQTPTTKMIAVTKSAESPQDAADLFTDLENAFQGKIDAAYFETSKYLLDVLNKKYSLLDHMQ  
 AMRYYLLGQGFIRHLMDLLKPELVRPATTLYQHNLTGILETAVRATNAQFDSPEILRRLDVRLLLEVSPGDTGWDVFSL  
 DYHVDGPIATVFTRECM SHYLRVFNFLWRAKRMEYILTDIRKGHMCNAKLLRNMPFSGVLHQCH**ILASEMVHF IHQMQY**  
 YITFEVLECSWDELWNKVQQAQDL DHI IAAHEVFLDTII SRCLLSDSRALLNQLRA**VFDQI IELQNAQDAIYRAALEEL**

QRRLQFEEKKQREIEGQWGVTAEEEEENKRIGEFKESIPKMCSQLRILTHFYQGI VQQLVLLTTSSDES LRFLSFRL  
DFNEHYKAREPRLRVSLGTRGRSSHT

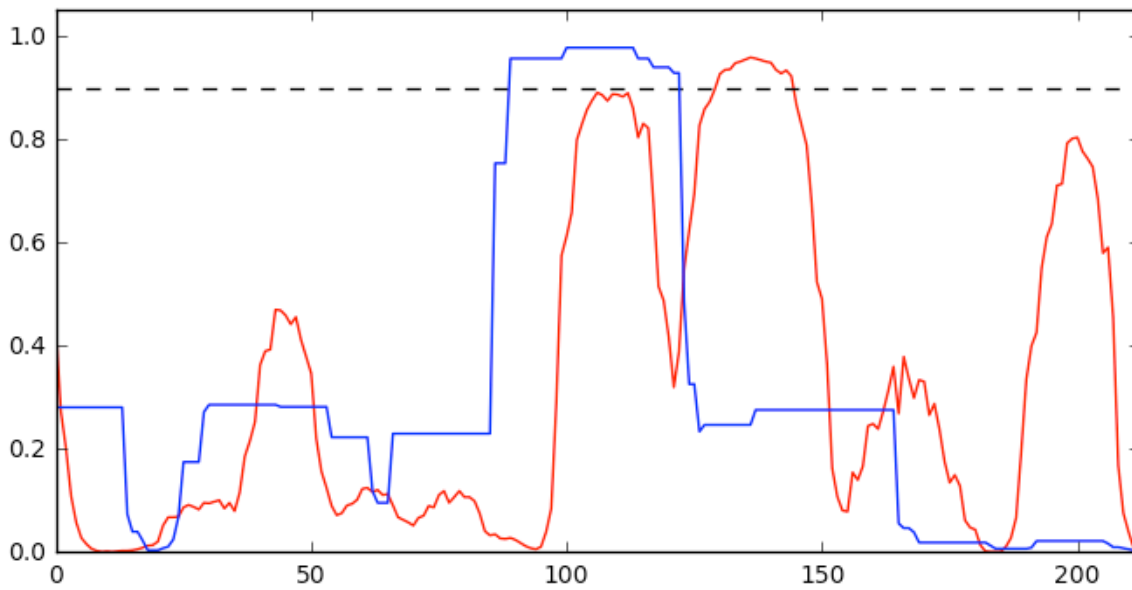

>NP\_009148.2 H+  
MRMTMEEMKNEAETTSMVSMPLYAVMYPVFNELERVNLSAAQTLRAAFIKA EKENPGLTQDIIMKILEKKSVEVNFTESL  
LRMAADDVEEYMIERPEPEFQDLNEKARALKQILSKI PDEINDRVRFLQT IKDIASAIKELLDTVNNVFKKYQYQNRAL  
EHQKKEFVKYSKSFSDLKTYFKDGKAINV FVSANRLIHQTNLILQTFKTVA

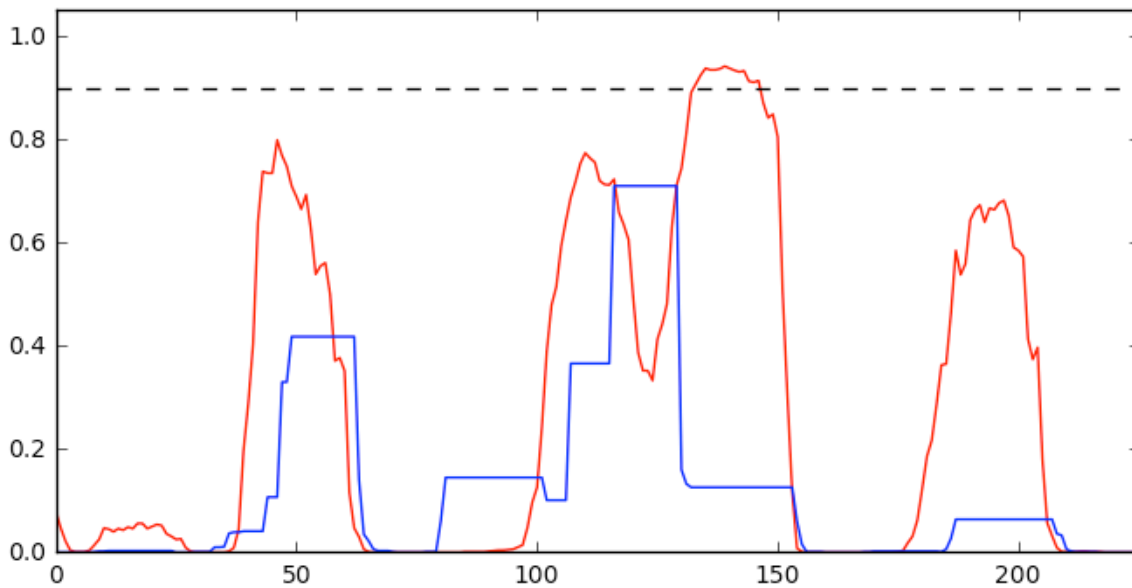

>NP\_037378.1 H+  
MDLRAGDSWGLACLCTVLWHLPAVPALNRTGDPGPGPSIQKTYDLTRYLEHQLRSLAGTYLNYLGPPFNEPDFNPPRLG  
AETLPRATVDLEVWRS LNDKLRLTQNYEAYSHLLCYLRGLNRQAATAELRSLAHFCTSLQGLLGS IAGVMAALGYPLPQ  
PLPGTEPTWTPGPAHSDFLQKMDDFWLLKELQTWLWRS AKDFNRLKKKMQPPAAAVTLHLGAHG F

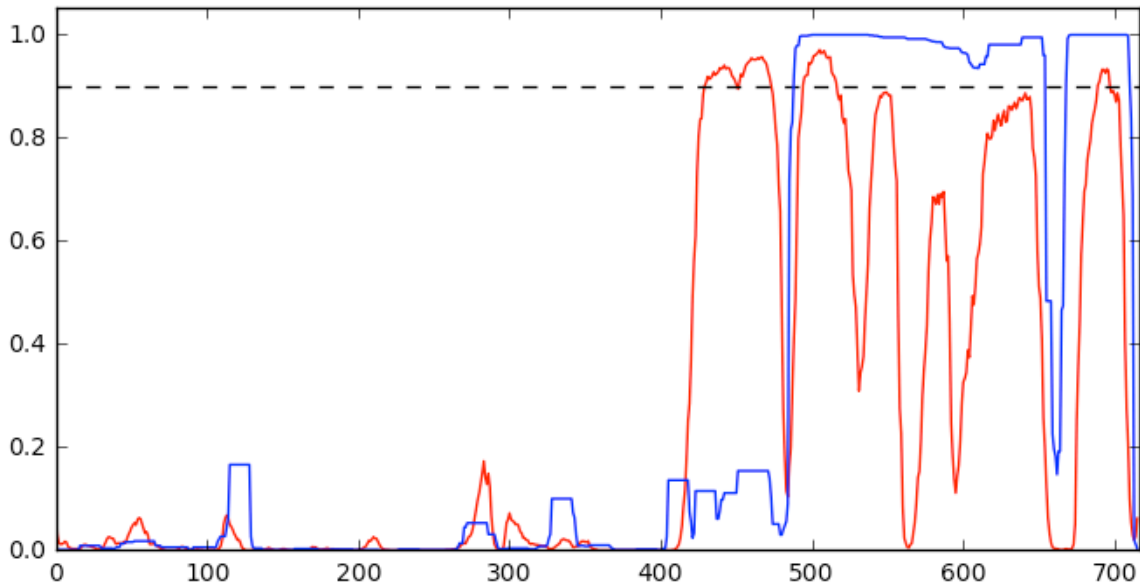

>NP\_054721.1 H+

MQSTANYLWHTDDLLGQGATASVYKARNKKSSELVAVKVFNTTSYLRPREVQVREFEVLRLKLNHQNIVKLFAVEETGGSR  
 QKVLVMEYCSSGSLLSVLESPENAFGLPEDEFVLRVLCVAGMNLRENGIVHRDIKPGNIMRLVGEEGQSIYKLTDFGA  
 ARELDDDEKFSVYGTTEYLHPDMYERAVLRKPKQKAFGVTVDLWSIGVTLYHAATGSLPFIPIFGGPRNKEIMYRITTE  
 KPAGAIAGAQRRENGPLEWSYTLPIITCQLSLGLQSQLVPILANILEVEQAKCWGFDQFFAETSDILQRVVVHVFSLSQAV  
 LHIIYIHAHNTIAIFQEAVHKQTSVAPRHQEYLFEGHLCVLEPSVSAQHIAHTTASSPLTLFSTAIPKGLAFRDPALDVP  
 KFVPKVDLQADYNTAKGVLGAGYQALRLA**RALLDQELMFRGLHWVMEVLQATCRRTLEVARTSLLYLSSSLGTERFSSV**  
**AGTPEIQELKAAEELRSRLRTLAEVLSRCSQNTITETQESLSSLNRELVKSRDQVHEDRSIQIQCCLDKMNFIYKQFKKS**  
**RMRPGLGYNEEQIHKLDKVNFSHLAKRLLQVFQEECVQKYQASLVTHGKMRVHVHETRNHLRLVGCVAACNTEAQGVQE**  
**SLSKLLEELSHQLLQDRAKGAQASPPPAPYPSPTRKDLLLHMQELCEGMKLLASDLLDNNRIIERLNRVPAPPDV**

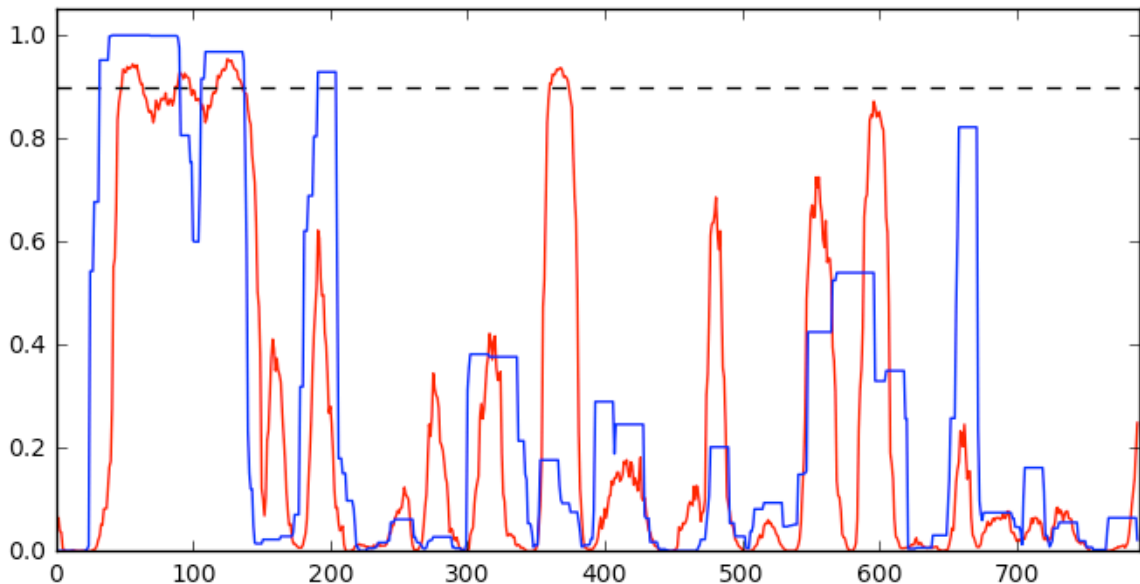

>NP\_056201.2 H+

MGTKMADLDSPPKLSGVQQPSEGVGGRCSEISAEILRSLTELQELEAVYERLCGEEKVVERELDALLEQQNTIESKMVT  
**LHRMGPNLQLIEGDAKQLAGMITFTCNLAENVSSKVRQLDLAKNRLYQAIQRADDILDLKFCMDGVQ TALRSEDYEQAAA**  
 HTHRYLCLDKSVIELSRQKESGSMIDANLKLQEAQRLKAIVAEKFAIATKEGDLQPVERFFKIFPLLGLHEEGLRKFS  
 EYLCKQVASKAEENLLMVLGTDMSDRRAAVIFADTLTLLFEGIARIVETHQPIVETYYGPRLYTLIKYLQVECDRQVEK  
 VVDKFIKQRDYHQQFRHVQNNLMRNSTTEKIEPRELDPIL**TEVTLMNARSELYL**RFLKKRISDFEVGDSMASEEVKQEH  
 QKCLDKLLNCLLSCTMQELIGLYVTMEEYFMRETVNKAVALDITYEKGQLTSSMVDDVIFYIVKKCIGRALSSSIDCLCA  
 MINLATTELESDFRDVLCNKLRMGFPATTFQDIQRGVTSAVNIMHSSSQGKFDTKGIESTDEAKMSFLVTLNNVEVCSE  
 NISTLK**KTLESDC TKLFSQIGGEQAQAKFDSCLSDLA**AVSNKFRDLLQEGLTELNSTAIPQVQVPWINSFFSVSHNIEE

EEFNDYEANDPWVQQFI LNLEQQMAEFKASLSPVIYDSLTLGLMTSLVAVELEKVVVKSTFNRLGGLQFDKELRSLIAYLT  
TVTTWTIRDKFARLSQMATILNLERVTEILDYWGPNSGPLTWRLTPAEVRQVLALRIDFRSEDIKRLRL

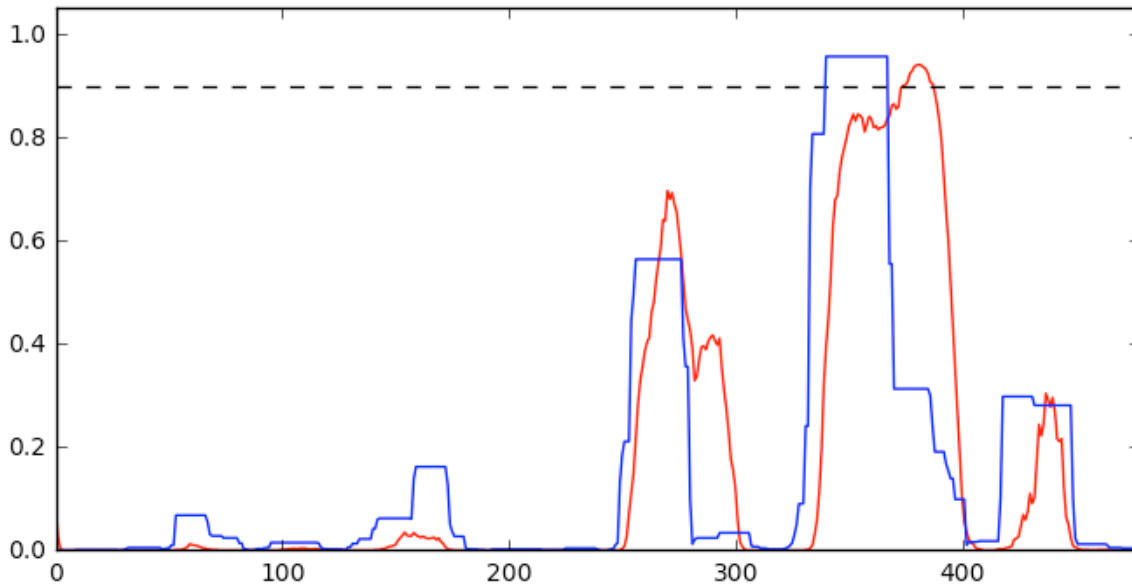

>NP\_056525.2 H-

MAAGGSGVGGKRSSKSDADSGFLGLRPTSVDPALRRRRRGPRNKKRGWRRLAQEPLGLEVDQFLEDVRLQERTSGLLSE  
APNEKLFVDTGSKEKGLTKKRTKVQKSSLLKPLRVDLILENTSKVPAPKDVLAHQVPNAKLRKEQLWEKLAKQGE  
LPREVRRAQARLLNPSATRAKPGPQDIVERPFYDLWASDNPLDRPLVGQDEFFLEQTKKKGVKRPARLHTKPSQAPAVEV  
APAGASYNPSFEDHQT LLSAAHEVELQRQKEAEKLERQLALPATEQAATQESTFQELCEGLLEESDGEPEPGQEGPEAG  
DAEVCPTPARLAT TEKKTEQQRREKAVHRLRVQQAALRAARLRHQELFRLRGIKAQVALRLAELARRQRRRQARREAEA  
DKPRLGRLKYQAPDIDVQLSSELTDSLRTLKPEGNILRDRFKSFQRRNMIEPREKAKFKRKYKVKLVKRAFREIQL

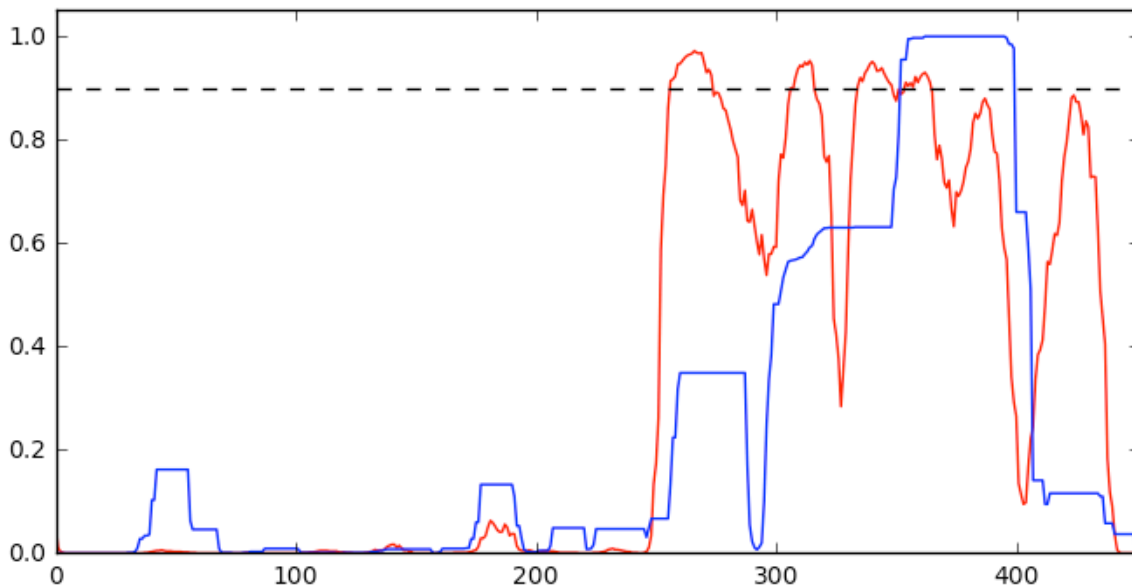

>NP\_057060.2 H+

MEGERRASQAPSSGLPAGGANGESPGGGAPFPSSGSSALLQAEVLDLDEDEDDLEVFVSKDASLMDMNSFSPMMPTSPLS  
MINQIKFEDEPDLKDLFITVDEPESHVTTIETFITYRIITKTSRGEFDSSEFEVRRRYQDFLWLKKGKLEEAHPTLIIPPL  
PEKFIVKGMVERFNDDFIETRRKALHKFLNRIADHPTLTFNEDFKIFLTAQAWELSSHKKQGPGLLSRMGQTVRAVASSM  
RGVKNRPEEFMEMNFI EILFSQKINLIDKISQRIYKEEREYFDEMKEYGPIHILWSASEEDLVDTLKDVA SCIDRCCKAT  
EKRM SGLSEALLPVVHEYVLYSEM LGMV MKRRDQIQAE L DSKVEVLT YKKADTDLLPEEIGKLEDKVECANNALKA DWER  
WKQNMQNDIKLAFTDMAENIHYEQCLATWESFLTSQTNLHLEEASEDKP

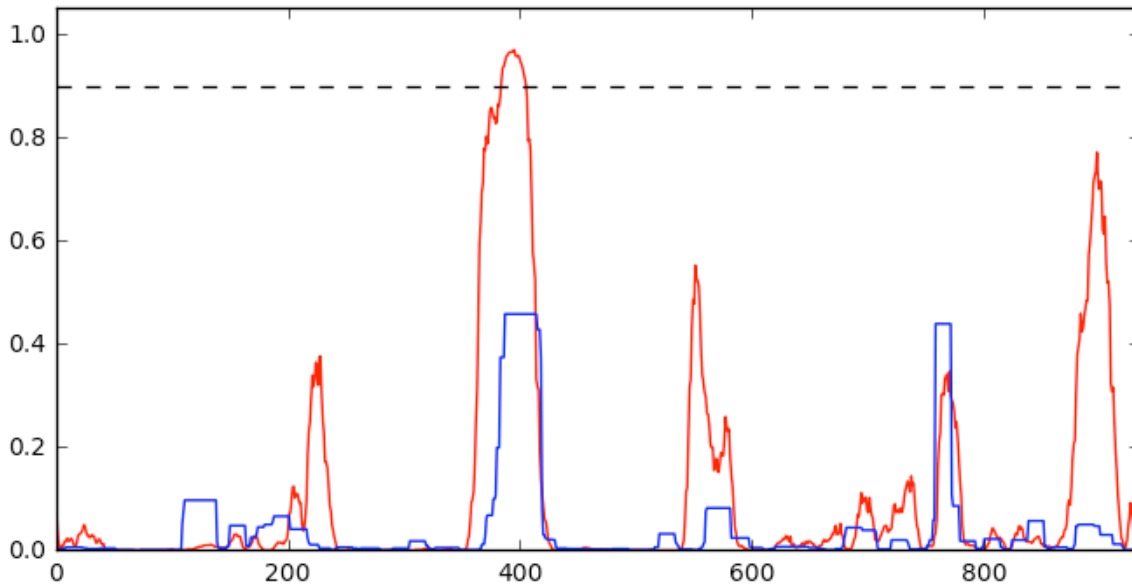

>NP\_058649.3 H+

MAASRLDFGEVETFLDRHPELFEYLMRKKGQEMVEKWLQRHSQGQALGPRPSLAGTSSLAHSTCRGSSVGGGTGPNG  
 SAHSQPLPGGDCGGVPLSPSWAGGSRGDGNLQRRASQKELRKSFARSKAIHVNRTYDEQVTSRAQEPLSSVRRRALLRK  
 ASSLPPTTAHILSALLESRVNLPYPPTAIDYKCHLKKHNERQFFLELVKDISNDLDTLSYKILIFVCLMVDADRCSL  
 FLVEGAAAGKKTLSKFFDVHAGTPLLPCSSSTENSNEVQVPWGKGIIGYVGEHGETVNI PDAYQDRRFNDEIDKLTGYKT  
 KSLLCMPIRSSDGEIIGVAQAINKIPEGAPFTEDDEKVMQMYLPFCGIAISNAQLFAASRKEYE**RSRALLEVNDLFEEQ**  
**TDLEKI**VKKIMHRAQTLLKCERC SVLLEDIESPVVKFTKSFELMSPKCSADAEN SFKESMEKSSYSDWLINNSIAELVA  
 STGLPVNISDAYQDPRFDAEADQISGFHIRSVLCVPIWNSNHQIIGVAQVLNRLDGKPFDDADQRLFEAFVIFCGLGINN  
 TIMYDQVKKSWAKQSVALDVLSYHATCSKAEVDKFKAAANIPLVSELAIDDIHFDDFSLDVDAMITAAALRMFEMELGMVQKF  
 KIDYETLCRWLLTVRKNYRMVLYHNWRHAFNVCQLMFAMLT TAGFQDILTEVEILAVIVGCLCHDLDRGTNNAFQAKSG  
 SALAQLYGT SATLEHHHFNHAVMILQSEGHNIFANLSSKEYSDLMQLLKQSILATDLTLYFERRTEFFELVSKGEYDWN  
 KNHRDIFRSMMLTACDLGAVTKPWEISRQVAELVTSEFFEQGDRELERLEKLTPSAIFDRNRKDELPRLQLEWIDSICMPL  
 YQALVKVNVKLPMLDSVATNRSKWEELHQKRLLASTASSSPASVMVAKEDRN

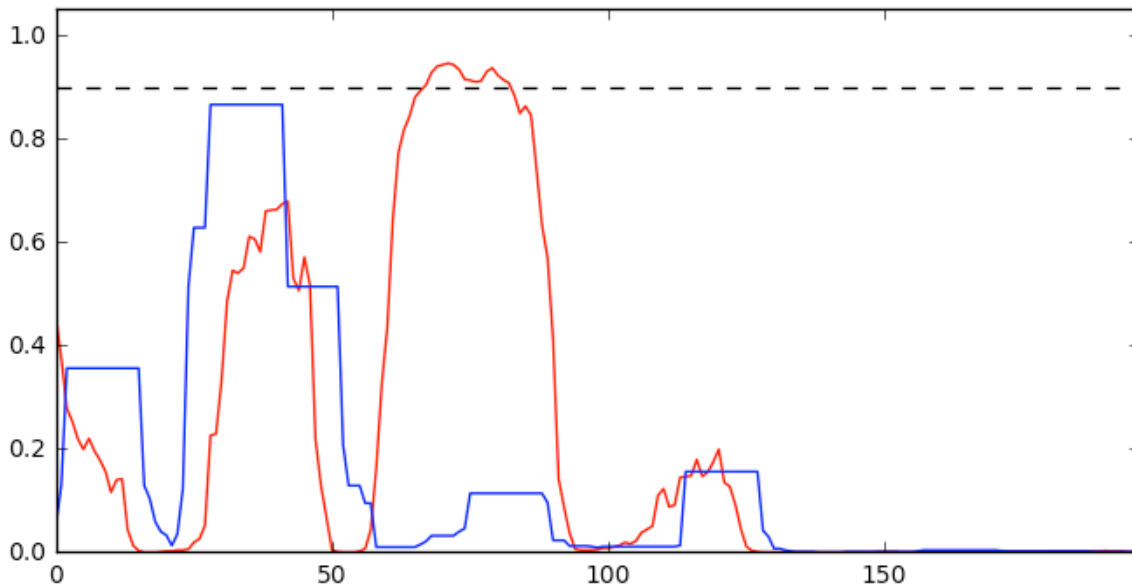

>NP\_066545.3 H+

MFCEKAMELIRELHRAPEGQLPAF**NEDGLRQVLEEMKALYEQN**QSDVNEAKSGGRSDLIPTIKFRHC**SLLRNRRCTVAYL**  
**YDR**LLRIRALRWEYGSVLPNALRFHMAAEEWENNYKRSLATYMRSLGGDEGLDITQDMKPPKSLYIEVRCLKDYGEFE  
 VDDGTSVLLKKN SQHFLPRWKCEQLIRQGVLEHILS

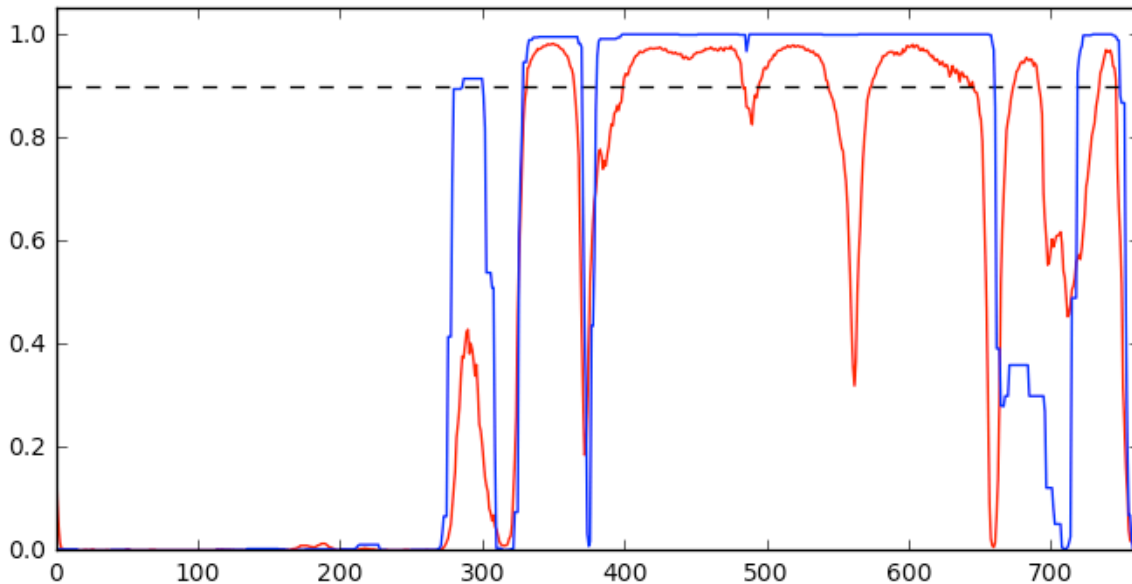

>NP\_073615.2 NH

MAMQEKYPTEGISHVTSPSSDVIQKSSLGTEWQTPVISEPFRSRFRSRCSSVADSGDTAIGTSCSDIAEDFCSSSGSPPF  
 QPIKSHVTIPTAHVMPSTLGTSPAKPNSTPVGPPSSKPLPSGLAESVGMTRNGDLGAMKHSPGLSRDLMYFSGATGENGI  
 EQSWFPAVGHERQEEARKFDIPSMESTLNQSAMMETLYSDPHHRVRFHNPRTSTSKELYRVLPEAKKAPGSGAVFERNGP  
 HSNSSGVLPLGLQPAPGLSKPLPSQVWQPSPTWHPREQ**SCELSTCRQOLELIRLQMEQMLQNGAICHHPAAFGPSLPI**  
**LEPAQWISILNSNEHLLKEKELLIDKQRKHISOLEQKVRESELQVHSALLGRPAPFGDVCLLRLQELQRENTFLRAQFAQ**  
**KTEALSREKIDLEKKSASEVEVQLIRESLKVALQKHSEEVKQEEVVKGRDKHINNLKCKQKQKQREKQORIE**  
**RYLADLPTLEDHQKQSQQLKDESELKSTELQEKVTELESLEETQAIQREKEIQLESRLQREAEFSSAGHSLQDKQSV**  
**EGEGPEVEMESWQKRYDSLQKIVEKQKQKMDQLRSQVQSLEQVAQEEGTSQALREEAQRDSALQQLRTAVKELSVQ**  
**DLIEKNLTLQEHLRQAQPGSPSPDTAQLALELHQELASCLQDLQAVCSIVTQRAQGHDPNLSLLLGIHSAQHPETQLDL**  
**QKPDVIKRLKEEVQQLRRDIEDLRTTMSDRYAQDMGENCVTQ**

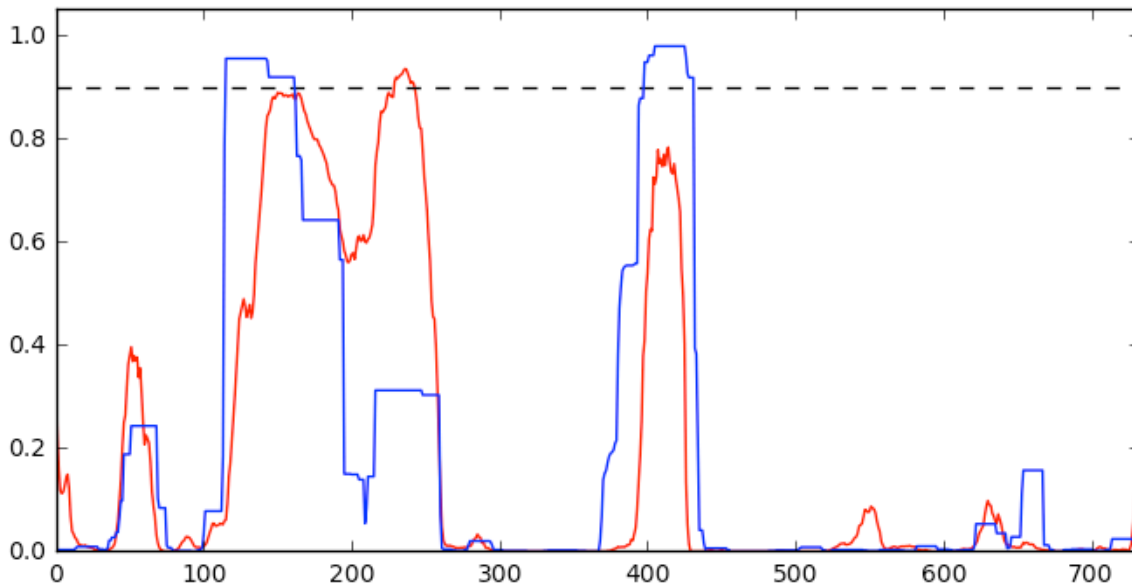

>NP\_683698.2 NH

MMQESATETISNSSMNQNGMSTLSSQLDAGSRDGRSSGDTSSSEVSTVELLHLQQQQALQAAQQLLQQQTSGLKSPKSSD  
 KQRPLQVPVSVAMMTPQVITPQQMQQILQQQVLS**PQQLQALLQQQAVMLQDFLDSGLENFRAALEKNQQLQEFYKQ**  
**EQHLQLLQQQQQQQQQQQQQQQQQQQQQQQQQQQQQQQQQQQQQHPGKQAKEQQQQQQQQQLAAQQLVFQQQLLQ**  
**MQQLQQQHLLSLQRQLISIPPGQAALPVQSLPQAGLSPAIEIQLWKEVTGVHSMEDNGIKHGGLDLTTNNSSTSSN**  
 TSKASPPITHHSIVNGQSSVLSARRDSSSHEETGASHTLYGHGVCKWPGCESICEDFGQFLK**HLNNEHALDDRSTAQCRV**  
**QMQVVQOLEIQLSKERERLQAMMTHL**HMRPSEPKPSPKPLNLVSSVTMSKNMLETSPQSLPQTPTTPTAPVTPITQGPSV  
 ITPASVPNVGAIARRRHSKYNI PMSSEIAPNYEFYKNADVRPPFTYATLIRQAIMESSDRQLTLNEIYSWFTRTFAYFR  
 NAATWKNVAVRHNLHLKCFVRVENVKGAVWTVDEVEYQKRRSQKITGSPTLVKNIPTSLGYGAALNASLQAAALAESSLPL

LSNPGLINNASSGLLQAVHEDLNGSLDHIDSNNGNSSPGCSPQPHIHSIHVKEEPVIAEDEDCPMSLVTTANHSPELEDDR  
EIEEEPLSEDL

## **Bibliography**

Li,C. *et al.* (2016) Critical evaluation of in silico methods for prediction of coiled-coil domains in proteins. *Brief. Bioinform.*, **17**, 270–82.
